# Generalizing biological surround suppression based on center surround similarity via deep neural network models

Xu Pan<sup>1</sup>, Annie DeForge<sup>2</sup>, Odelia Schwartz<sup>1\*</sup>

<sup>1</sup> University of Miami, Coral Gables, FL, 33146, USA.

<sup>2</sup> Bentley University, Waltham, MA, 02452, USA.

\* odelia@cs.miami.edu

## Abstract

Sensory perception is dramatically influenced by the context. Models of contextual neural surround effects in vision have mostly accounted for Primary Visual Cortex (V1) data, via nonlinear computations such as divisive normalization. However, surround effects are not well understood within a hierarchy, for neurons with more complex stimulus selectivity beyond V1. We utilized feedforward deep neural networks and developed a gradient-based technique to visualize the most suppressive and excitatory surround. We found that deep neural networks exhibited a key signature of surround effects in V1, highlighting center stimuli that visually stand out from the surround and suppressing responses when the surround stimulus is similar to the center. Even when the center stimulus was altered, the most suppressive surround surprisingly followed. This ties to notions of efficient coding and salience perception, although the networks were trained to classify images. Through the visualization approach, we generalized previous understanding of surround effects to more complex stimuli, in ways that have not been revealed in visual cortices. Our results emerged without specialized nonlinear computations, but due to subtraction and the stacking of layers. We identified further successes including V2 surround data for textures that cannot be explained by divisive normalization models, along with mismatches to the biology that could not be explained by the feedforward deep neural networks. Our results provide a testable hypothesis of surround effects in higher visual cortices, and the visualization approach could be adopted in future biological experimental designs.

## Author summary

Neural responses and perception of a visual stimulus are influenced by the context, such as what spatially surrounds a given feature. Contextual surround effects have been extensively studied in the early visual cortex. But the brain processes visual inputs hierarchically, from simple features up to complex objects in higher visual areas. Contextual effects are not well understood for higher areas of cortex and for more complex stimuli. Utilizing artificial deep neural networks and a visualization technique we developed, we found that deep networks exhibited a key signature of surround effects in the early visual cortex, highlighting center stimuli that visually stand out from the surround and suppressing responses when the surround stimulus is similar to the center. Even when the center stimulus was altered, the most suppressive surround surprisingly followed. This generalized for more complex stimuli that have not been revealed in the visual cortex. Our findings relate to notions of efficient coding and salience perception,

and emerged without incorporating specialized nonlinear computations typically used to explain contextual effects in the early cortex. Our results provide a testable hypothesis of surround effects for more complex stimuli in higher cortical areas; the visualization approach could be adopted in biological experimental designs.

## Introduction

Both biological and artificial systems seek to make sense of complex structured information in the world. A key aspect of sensory input is that its interpretation at a given point depends on the context, for example, what surrounds a given feature or object. Spatial context in vision plays a role in perceptual grouping [1] and segmentation [2], highlighting salient objects in which a stimulus stands out from its background [3], and resulting in visual illusions [4,5]. Deficits have been associated with disorders [6–8]. Though contextual surround effects are ubiquitous in visual cortex, they are not well understood within hierarchical systems such as deep neural networks and for neurons with more complex stimulus selectivity beyond V1.

A rich set of surround effects have been documented in the Primary Visual Cortex (V1) in neurophysiology experiments and respective modeling studies [9–28]. In the experiments, researchers typically place a stimulus in the center (i.e. the classical receptive field) and in the surround (i.e. beyond the classical receptive field). Although the surround stimulus does not elicit a response by itself, it can nonlinearly modulate the response to the center stimulus. Modeling studies have addressed V1 data by incorporating nonlinear computations such as divisive normalization or dynamical circuitry [14, 19, 23, 28, 29].

Surround effects are less well understood in cortical areas beyond V1 (though see [30, 31]). Moreover, surround suppression in V2 for textures versus noise [30] cannot be simply explained by divisive normalization models that have been successful for V1 data. Therefore, novel experimental paradigms and hierarchical models that make predictions on complex features are in demand to study surround effects in higher visual areas. In recent years, Deep Convolutional Neural Networks (CNNs) that stack up multiple layers of computation have achieved astonishing visual task performance and have been used to model visual neurons across the cortical hierarchy [32–39]. But beyond the observation that deep neural networks can exhibit surround suppression [39], it is not clear what properties of the center and surround stimuli lead to surround suppression; to what extent feedforward CNNs that lack specialized nonlinear computations such as divisive normalization and lateral or feedback connections can capture the rich surround effects that have been studied biologically; and excitingly, what predictions CNNs can make about surround effects in higher visual cortex with complex stimuli.

Moreover, feature visualization techniques have become popular in neurophysiology experiments [40–42] and in analyzing what stimuli most excite CNN artificial neurons [43–45]. However, neither in CNN studies nor in neurophysiology, have such techniques been extended to visualizing surrounding effects. Developing surround visualization techniques could address the limitation in current neurophysiology studies that the surround stimuli are usually simple parametric stimuli or are selected from a fixed set of textures or natural images.

Utilizing feedforward deep neural networks and developing a novel gradient-based visualization technique, we found that CNN neurons exhibit a key signature of surround suppression, namely that they are most suppressed when the surround matches the center and less suppressed when the surround differs from the center; and that this even follows when the center orientation is altered. This is known for V1 data [46], but has not been observed in higher cortical areas. These findings generalize the idea of

homogeneity-dependent surround suppression to more complex stimuli, thus providing a testable hypothesis of surround effects in higher visual cortices. Surround suppression for homogeneous center and surround can highlight center stimuli that stand out from the surround, relating to visual salience [3]. Suppression based on center-surround similarity also relates to notions of efficient coding. Note that we use the term homogeneity to indicate similarity of the center and surround in terms of stimulus features such as orientation, color, spatial frequency and textures, rather than examining the conditions of statistical similarity as in some modeling studies of natural stimuli [25]. Our results can partly be attributed to subtraction within the receptive field, but the observation that the surround could follow the center change requires a stacking of layers. The visualization method reveals a generalization of the idea of homogeneity to complex stimuli and provides a new experimental scheme that can be used in biological experiments. We also found mismatches to the biology, highlighting the limitations of the feedforward architectures, and identifying the need to further incorporate nonlinear computations and circuitry into deep neural networks [47–52].

## Results

### The most suppressive surround grating matches the optimal orientation

Before studying the surround effects in CNN neurons, we first defined the center and surround region through a method inspired by neurophysiology studies [16] (Fig 1). We trained two standard network architectures, Alexnet [53] and VGG16 [54], which have been used extensively in neural modeling (see Methods). Without losing generality, we focused on the center neurons in each feature map. However, unlike cortical neurons, each CNN neuron has a well-defined receptive field (see Methods). We used this theoretical receptive field as the outer size of the stimuli in the following experiments. To define a "classical receptive field" for the CNN neurons, we adopted a physiology approach [16]: first, we used a grid search to find the optimal spatial frequency and orientation for each neuron; then we used these optimal stimuli to find the diameter tuning curves. For the boundary between the center and surround, we used the grating summation field that reached at least 95% of the peak responses (see Methods). By the conventional definition used in neuroscience, a stimulus placed outside the classical receptive field by itself does not elicit any neural responses (Fig 1, Fig 2B). CNN neurons do not have a clear separation of center and surround and therefore did not match this exactly, but the surround orientation tuning curves were mostly flat and low, except for some early layers (Alexnet layer 2 and VGG16 layer 5).

First, we tested one of the most well-known surround effects found in V1 that the surround induces the largest response suppression when the grating orientations of the center and surround are the same [15, 17]. We computed three types of orientation tuning curves: the center orientation tuning curve, the surround orientation tuning curve, and the surround suppression orientation tuning curve for stimuli with a fixed optimal center and a varying surround orientation (surround suppression tuning curve for abbreviation) (Fig 2A). We only included neurons with sufficiently large center and surround (grating summation field in between 30% and 70% of the theoretical receptive field) in the analysis. Due to the tiny receptive fields in the early layers in VGG16, only layer 4 and successors had neurons that satisfied this criteria.

In neurophysiology studies, the most suppressive surround has the same orientation as the optimal center orientation, and the surround can be facilitative when it differs from the center [15, 17] (Fig 2B). We found that on average, most layers in both CNNs showed the most suppression when the surround orientation matched the center and the

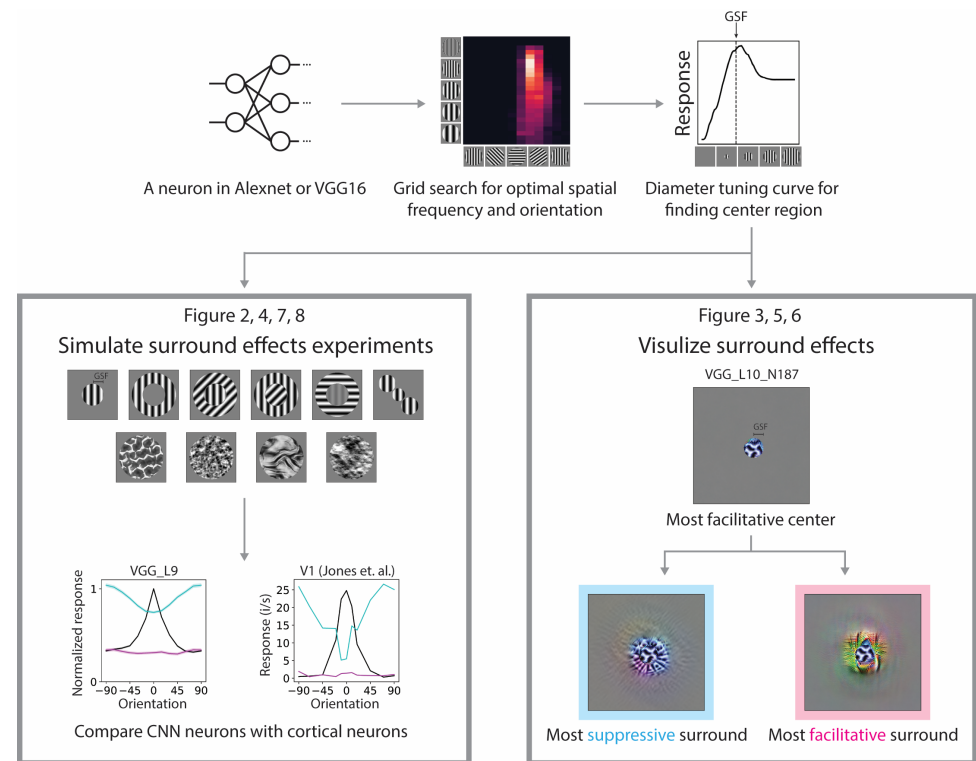

**Fig 1. Probing surround effects in CNNs.** Top left: A neuron was taken from either Alexnet or VGG16. Top middle: The optimal spatial frequency and grating orientation were found by grid search. Top right: Then the grating summation field (GSF) was read from the grating diameter tuning curve. Bottom left: We simulated a set of in-silico physiology experiments with the stimuli that were used in neurophysiology studies. Representative stimuli are shown. The responses of CNN neurons are compared with cortical neurons. Bottom right: We visualized surround effects in CNN neurons by a two-step optimization approach. First, the most facilitative center was optimized within the grating summation field. Then, the most suppressive and facilitative surround were optimized with the fixed most facilitative center.



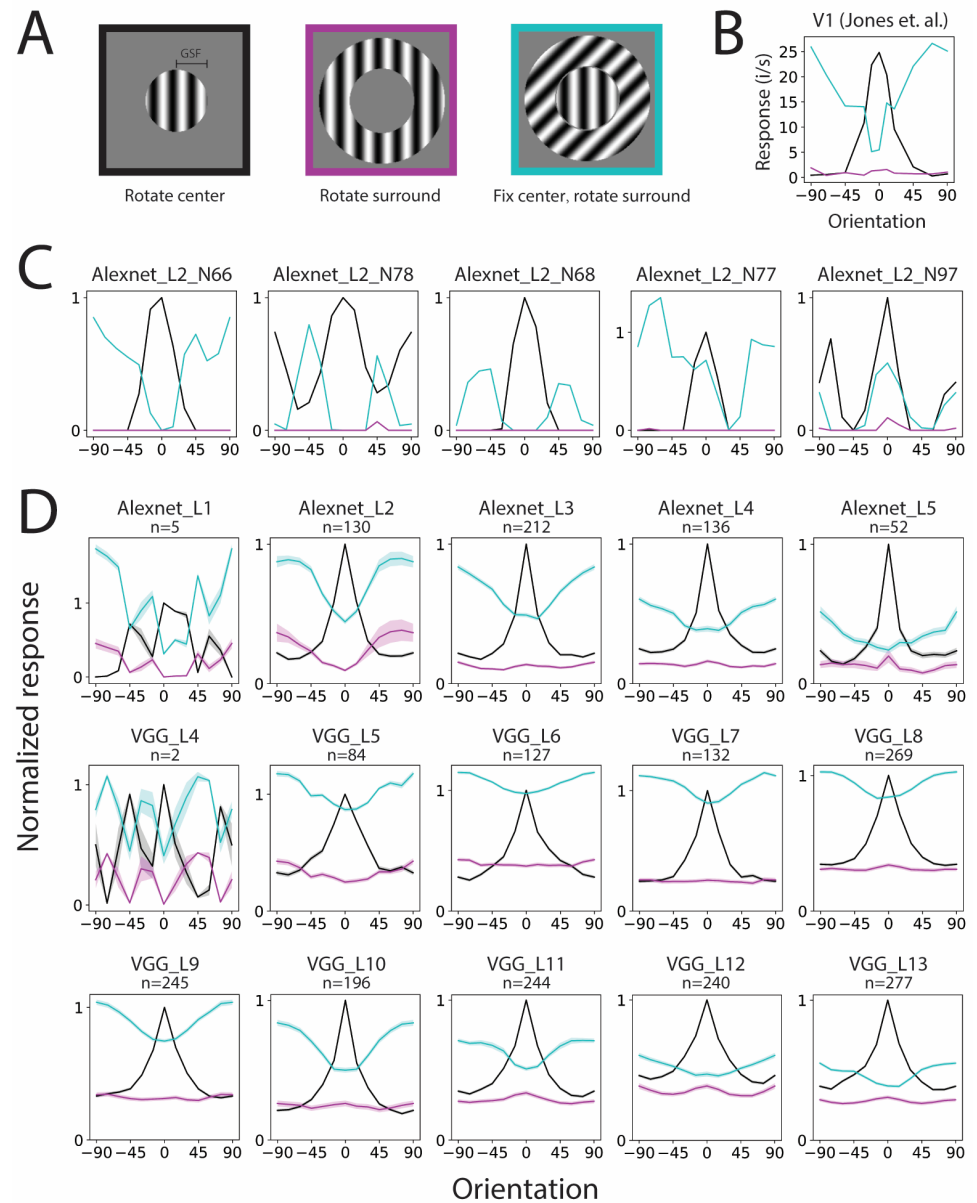

**Fig 2. Grating orientation tuning of the CNN neurons.** A. Stimuli used in the experiments: rotating the center (left, black); rotating the surround (middle, purple); fixing the center at the optimal orientation and rotating the surround (right, cyan). B. Neurophysiology V1 data of the three types of orientation tuning curves (reproduced from [17]). The most suppressive surround orientation matches the optimal center orientation. The surround stimuli alone hardly elicit responses. 0° represents the optimal orientation (same for the following plots). C. Example orientation tuning curves of CNN neurons. D. Averaged orientation tuning curves in CNN layers. Shaded area indicates s.e.m.

least suppression (and even facilitation in some layers of VGG16) when the orientations differed. This similarity between the CNNs and the neurophysiology held for most layers, except for Alexnet layer 1 and VGG16 layer 4 which lacked sufficient neurons due to the small receptive fields and not meeting our selection criteria (Fig 2D). We further found that when the center contrast is low, there is less influence of whether the surround orientation matches the center or is orthogonal to the center (Supplementary Fig 5). Such finding aligns with neurophysiology studies [9, 10, 15, 21, 55].

We found that the surround suppression in the early layers was weaker than in the late layers. Regarding the amount of surround suppression, Alexnet layer 3 and VGG16 layer 10 were closest to the V1 data. In the neurophysiology data, the strongest responses in the center tuning curve are aligned with the strongest suppression in the surround suppression tuning curve. To examine this quantitatively in the CNN, we measured the negative correlation between the two curves. Consistent with the neurophysiology observations (-0.858 in [17]), all layers of the CNN showed significant negative mean correlations between the two curves (Supplementary Fig2-4).

By screening individual neurons, we found that there were a variety of interesting surround suppression behaviors that had not been documented in neurophysiology studies (Fig 2C). This included neurons with a double-peak center orientation tuning curve, for which their surround suppression curve matched both peaks (Alexnet\_L2\_N78); neurons with a regular single-peak center orientation tuning curve but for which their surround suppression curve had two peaks (Alexnet\_L2\_N68); neurons for which their most suppressive surround orientation did not match the center orientation (Alexnet\_L2\_N77); and neurons for which their surround suppression curve matched the center orientation tuning curve (Alexnet\_L2\_N97).

## Visualization of the most suppressive surround appears homogeneous to the center

In both neuroscience and machine learning, there is interest in understanding what visual features neurons are sensitive to. Indeed, with recent advances in deep neural networks, there has been some focus on visualizing what input features induce the most or the least responses in CNN neurons, for instance using gradient based optimization methods [43]. Inspired by neurophysiology studies, we were interested in going beyond such methods and visualizing the most suppressive and facilitative surround and testing if the homogeneous surround induces the most suppression is still applicable to complex stimuli that are beyond gratings. We therefore modified the gradient-based optimization approach to a two-step optimization: first, we optimized the stimuli inside the center region to elicit the strongest response; then, we optimized the stimuli in the surround region that suppressed or facilitated the strongest response when combined with the optimal center stimuli (Fig 1) (see Methods). An advantage of optimizing via two steps over one step is that we can separate the center and surround components more clearly; thus we can study the questions such as what are the most suppressive surround when the center is not optimal.

Figure 3 shows a curation of the visualizations (see the full set in the online repository [https://gin.g-node.org/xupan/CNN\\_surround\\_effects\\_visualization](https://gin.g-node.org/xupan/CNN_surround_effects_visualization)). We selected them to show the variety. In general, the most suppressive surround looked similar to the center, whereas the most facilitative surround looked dissimilar to the center. Based on the visual appearance, we found several typical patterns. We observed visual similarity along various features, such as color and spatial frequency; the most suppressive surround could have similar color or spatial frequency to the center (Fig 3A). We quantified the color similarity between the center and surround, by using the correlation between the averaged color channels in the center and surround (Fig 5A) as

a metric. The most suppressive surround showed a high (positive) color correlation with the center, whereas the most facilitative surround showed a low (negative) color correlation in all layers.

Many neurons showed combined features of color and spatial frequency. And in deeper layers, the visual similarity between the center and the most suppressive surround could be more complex (Fig 3B). For example, the color similarity was not limited to a single color, but to a color scheme (VGG\_L10\_N124, VGG\_L10\_N33, VGG\_L10\_N114, etc.); if a swirl was in the center, the most suppressive surround could include several swirls (Alexnet\_L4\_N3, VGG\_L8\_N130, VGG\_L133\_N75, etc.); the line shapes of the center and most suppressive surround matched (VGG\_L10\_N124, VGG\_L10\_N114, VGG\_L10\_N128, Alexnet\_L5\_N57, etc.).

These effects were not rare in the CNN neurons; we found that most neurons showed visual similarity/dissimilarity between the most suppressive/facilitative surround and the center to some extent. For a full visualization of all neurons in the two CNNs, see the online repository. However, we found neurons that did not show this effect, especially when the surround features were geometrically arranged rather than uniform across the surround, and when the features were arranged as object-like shapes (Supplementary Fig1).

Our visualizations align with findings from neurophysiology studies that the most suppressive surround occurs when the center and surround are homogeneous [15, 17, 25, 46], but go beyond simple stimuli and early processing stages.

## The most suppressive grating surround follows the change of the center orientation

An interesting nonlinear interaction between the center and surround is that even when the center grating orientation is not optimal, the most suppressive surround orientation still matches the non-optimal center orientation. This has been documented in V1 neurons [15, 46] (Fig 4B). We tested this effect in the CNN neurons. We used a similar design to the neurophysiology studies [15], setting the center orientation at 0°, 15°, 30°, and 45° degrees off from the optimal orientation, and rotating the surround. We obtained four surround suppression curves for four center orientations and each neuron (Fig 4A). On average, later layers (Layer 6 and successors) in VGG16 captured this effect, with shifted dips matching the center orientation (Fig 4D). This trend was less pronounced in Alexnet. It is surprising that CNNs could capture this effect to some extent, since all previous successful models of surround effects included non-linear interactions between the center and surround (e.g., in a divisive manner). It appears that even without an explicitly divisive surround, CNNs could still achieve similar center-surround interactions by stacking layers. However, we did not see this effect in more shallow networks and early layers of deep networks (e.g. a 5-layer Alexnet, and earlier layers of VGG16), indicating the computations may not be complex enough to support this interaction (Fig 4D).

Although the average effects were consistent with the biology, we also found a variety of untypical behaviors (Fig 4C). When the curve had two peaks/dips, some neurons showed a shift of both dips (VGG\_L9\_N228). Some neurons also showed a uniform drop of the curves without shifting the dips (VGG\_L9\_N19). Interestingly, some neurons showed dip shifts in the opposite direction (VGG\_L9\_N16). Again, these untypical behaviors may possibly be found in the brain and play a role in completing the representation space.

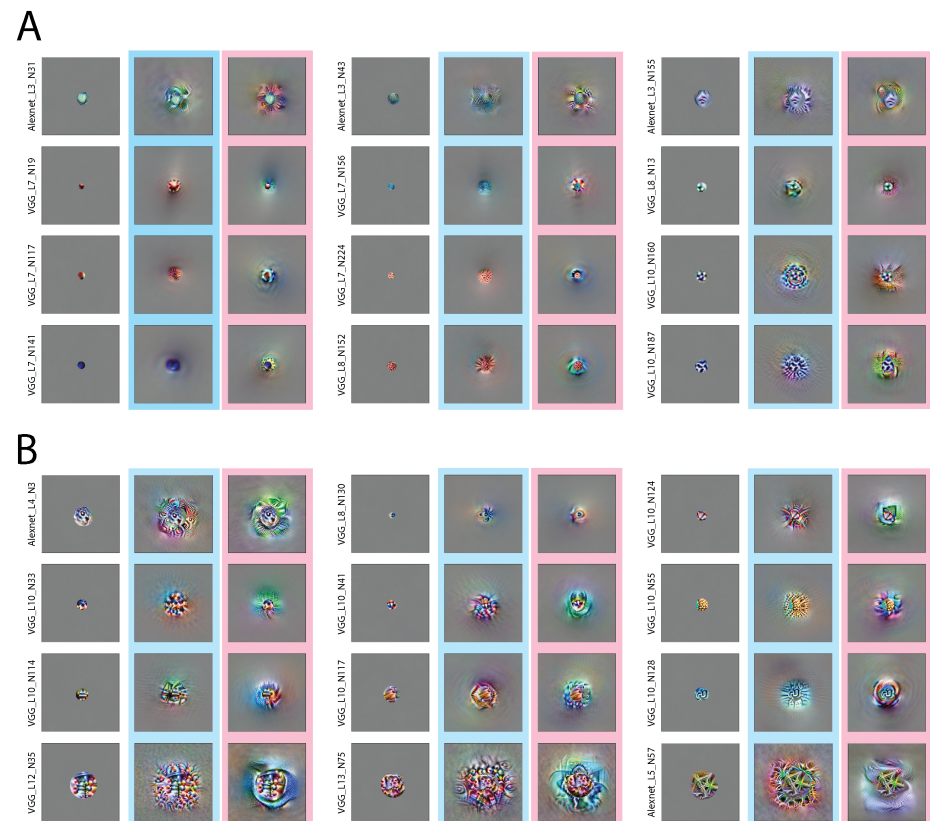

**Fig 3. A curation of visualizations.** The most facilitative center (left image with no frame), most suppressive surround (middle image with cyan frames), and most facilitative surround (right image with pink frames) are shown for each selected neuron. A. Example neurons in early layers that have recognizable features: color (left column) and frequency (middle and right column). The most suppressive surrounds appeared similar to the center, whereas the most facilitative surrounds appeared different from the center. B. Example neurons in late layers that have more complex patterns.

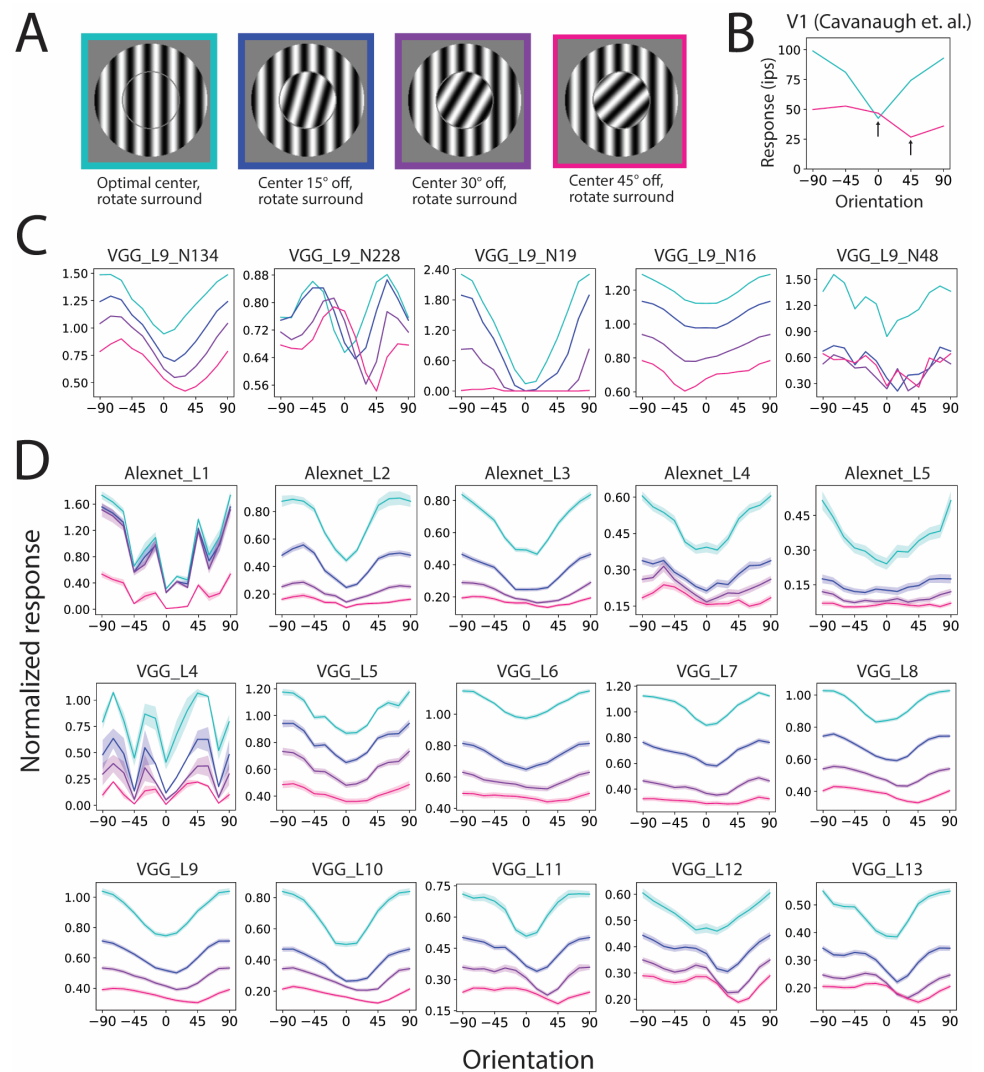

**Fig 4. Surround suppression tuning when the center is not at the optimal orientation.** A. Stimuli used in the experiments: the center was either fixed at the optimal orientation or rotated 15°, 30°, 45° off from the optimal orientation. The surround suppression tuning curve was acquired by changing the surround orientation. B. Neurophysiology V1 data of Surround suppression tuning curves, when the center was either optimal or rotated 45° away from the optimal (reproduced from [15]). Arrow indicates the center orientation. The most suppressive surround matched the center orientation. C. Example surround suppression tuning curves of CNN neurons. D. Averaged surround suppression tuning curves in CNN layers. Shaded area indicates s.e.m.

## Visualization of the most suppressive surround follows changes in the center

Since, in the above simulation, the homogeneity idea is still valid for non-optimal center grating orientation, we asked if such effects can be revealed in visualizations and generalized for complex stimuli. We altered the optimal center stimuli in two ways and tested if the most suppressive surround can follow the change in the center. First, for each neuron we permuted the three color channels, i.e. red, green, and blue, of the center stimuli. Then we computed the most suppressive and facilitative surround as before (Fig 5). We found that for many neurons the most suppressive surround matched the altered center color. The averaged color correlations are shown in Figure 5A. The altered center of most later layers (after layer 5 in VGG16) had positive color correlations with the most suppressive surround and negative color correlations with the most facilitative surround, though the magnitudes of correlation/discorrelation were smaller than the optimal center. This effect was less pronounced in Alexnet, which indicates the CNNs may need a sufficient number of layers to achieve this type of nonlinearity.

We then further tested the idea of homogeneity by exchanging the entire optimal center. Some CNN neurons showed an ability to match the surround to the exchanged center stimuli. Figure 6A shows an example neuron that had such ability. Its optimal center appeared as purple curves; when the center was changed to triangles, yellow curves, and blobs, the most suppressive surround could match the altered center pattern. Figure 6B shows 5 neurons (including the one in Figure 6A) in VGG16 layer 10. The leftmost column shows the optimal center for each neuron. The 5 optimal centers were used for each neuron to derive the most suppressive surround stimuli. By looking at the columns, we see that the most suppressive surround depends on the center stimuli. Furthermore, some neurons could match the surround to the altered center stimuli.

Our results suggest that the findings that the most suppressive surround orientation follows the center stimulus in Figure 4 [15, 46] can be generalized to more complex stimuli in the CNN neurons. Such effects with complex stimuli have not been tested in cortical neurons, and therefore provide a testable hypothesis of surround effects in higher visual cortices.

## Texture induces less surround suppression than spectrally matched noise

There have been limited studies on surround effects beyond V1. When using grating stimuli, V2 neurons have shown some similar properties to V1 regarding surround effects [56]. Textures that extend beyond the classical receptive field can result in surround suppression in both V2 [30] and V4 [31], an observation that has been referred to as "de-texturization". However, other observations in V2 cannot be simply explained by surround suppression based on the center surround similarity, and rather depend on whether the stimulus is naturalistic or noise. In particular, V2 neurons show less surround suppression for naturalistic textures (that include dependencies across space) than for spectrally matched noise [30] (Fig 7D). We therefore asked whether CNN neurons could capture such effects, following a similar design [30]. We synthesized 225 naturalistic texture images from 15 original texture images and their corresponding spectrally matched noise images (see Methods). The optimal textures for each neuron were determined by finding the modulation indexes, i.e. the difference of the responses to the naturalistic and noise images divided by the sum of the two (Fig 7B). The top 5 textures for each neuron were used for the following experiment. For each neuron, we computed the naturalistic and noise diameter tuning curves (Fig 7C, E). We then computed the suppression index (SI), i.e. the difference of the max and min response



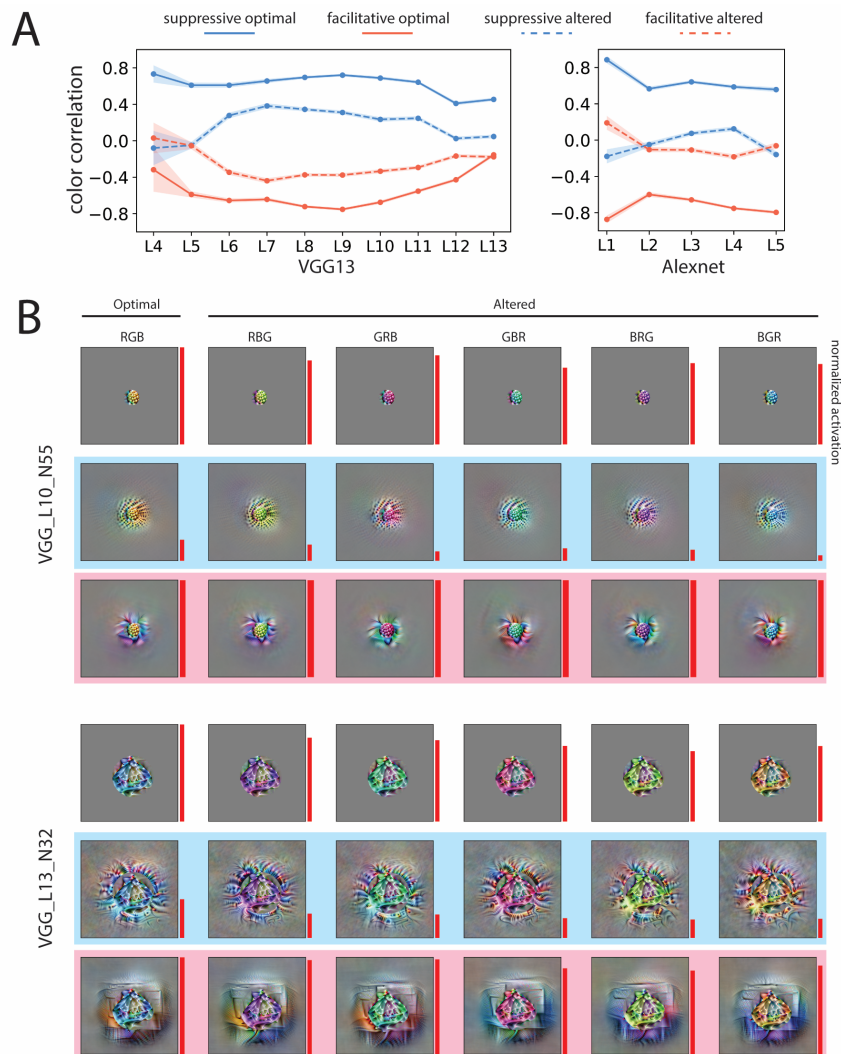

**Fig 5. The most suppressive surround can follow the center color change.** A. Averaged color correlation of the center the surround in VGG16 (left) and Alexnet (right). Higher values indicate higher color similarity between the center and surround. Four conditions are shown in the plot: the correlation between the optimal center and the most suppressive surround (solid blue); the optimal center and the most facilitative surround (solid red); the altered center and the most suppressive surround (dotted blue); the altered center and the most facilitative surround. The optimal center is defined as the most facilitative center. The altered center is the optimal center with three color channels permuted. The shaded area indicates the s.e.m. B. Two example neurons (VGG.L7.N7 and (VGG.L10.N55)) showing that the most suppressive surround can match the center color. For each neuron, the first row are the center stimuli; the second row are the center stimuli with the most suppressive surround; the third row are the center stimuli with the most facilitative surround. The first column is the optimal center; other columns are the optimal center with the three color channels permuted. The area of the red bars on the right of each image represents the normalized response (relative to the optimal center response).

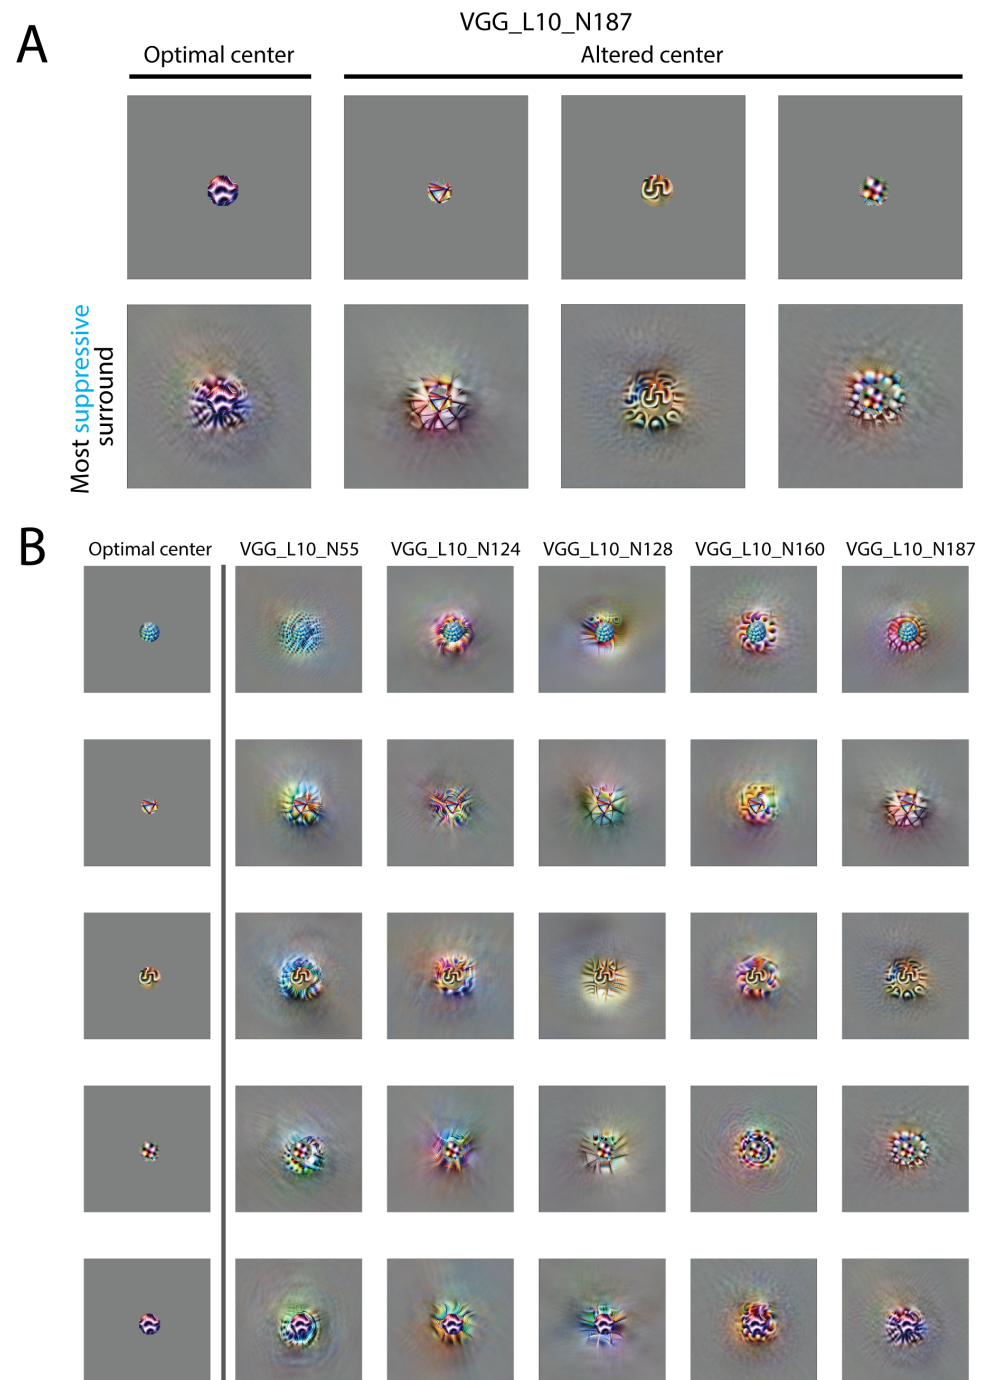

**Fig 6. The most suppressive surround depends on the center pattern.** A. An example neuron in VGG16 layer 10. The first row is the center stimulus used to optimize the most suppressive surround; the second row is the most suppressive surround using the corresponding center in the first row. The first column is this neuron's optimal center; the remaining columns are center patterns from the other neurons. B. Visualizations of most suppressive surround of 5 neurons with exchanged centers. The first column shows 5 optimal centers for the 5 selected neurons. Other columns are the most suppressive surround with different centers. The visualizations on the diagonal line used neurons' own optimal center. The most suppressive surround strongly depends on the center pattern. Some most suppressive surrounds visually matched the center pattern.

divided by the max response, for the naturalistic and noise stimuli from the diameter tuning curves.

The CNN neurons exhibited more surround suppression for the naturalistic textures than for the spectrally matched noise, except for early layers of the CNNs (Alexnet layer 1 and VGG16 layer 4). This was observed in both the averaged diameter tuning curves (Fig 7E) and scatter plots (Supplementary Fig6) of the suppression index. Such effects were consistent with the V2 neurophysiology data (Fig 7D). This result is interesting because it is not expected from a divisive normalization model that focuses on the homogeneity of center and surround. We found that it arises in the CNN from a stacking of layers.

## Failures of capturing cortical contextual surround effects in CNNs

Though in the above experiments we found some striking commonalities between the CNN neurons and cortical neurons regarding surround effects, we also found failures of the CNNs. One mismatch we found is related to the geometric structure of the surround. Cortical neurons show the largest suppression when the stimulus in the surround is in the location that aligns with the orientation [15] (Fig 8A). We did not find this effect in CNN neurons. Though in some layers responses were significantly different with different surround locations, the effect size was small compared to the biology (Fig 8C). In particular, when the orthogonal surround was used, the trend did not match biology (Fig 8C). We also did not find individual neurons that matched the biological trend (Fig 8B). See supplementary figure 7 for the average effects of the layers.

Other mismatches we found are related to the contrast. Neurophysiology studies have shown that the grating diameter tuning curve peaks later when the contrast is low [10, 16] (Fig 8 D, E). Though some individual CNN neurons showed this effect, we did not find this consistently in the CNN neurons (Fig 8 F, G, Supplementary Fig 8). Only layer 8 in the VGG16 showed significantly more neurons where the low contrast stimuli shift peak later (Fig 8 G, Supplementary Fig 8). See supplementary figure 8 for the averaged curves and peak shift histogram of the layers.

## Discussion

We studied visual contextual surround effects in CNN neurons. First, we simulated a classic visual surround effects experiment in CNN neurons and found that the most suppressive surround grating orientation matches the optimal center orientation (Fig 2). Second, we developed a method to visualize the surround effects in CNN neurons and found that the most suppressive surround is visually similar to the optimal center pattern (Fig 3). The visualization experiments could be thought of as a generalization of the classic grating experiments, but with complex stimuli. We also found that for both grating (Fig 4) and more complex stimuli per the visualization (Fig 5) experiments, the most suppressive surround in deeper layers can still match the center even when the center is non-optimal. The finding for more complex stimuli presents an interesting prediction that could be tested experimentally.

In recent years, optimization-based neuron control techniques have been used in neuroscience experiments to find stimuli that elicit the strongest neural responses and even control the population activation pattern [40–42]. Optimization techniques similar to what we have shown here for the CNNs could be modified to find the most suppressive surround stimuli in neurophysiological studies (since it is extremely difficult to calculate the gradient in the brain, one would need to replace the gradient-based optimizer with a gradient-free optimizer such as Covariance Matrix Adaptation). Such

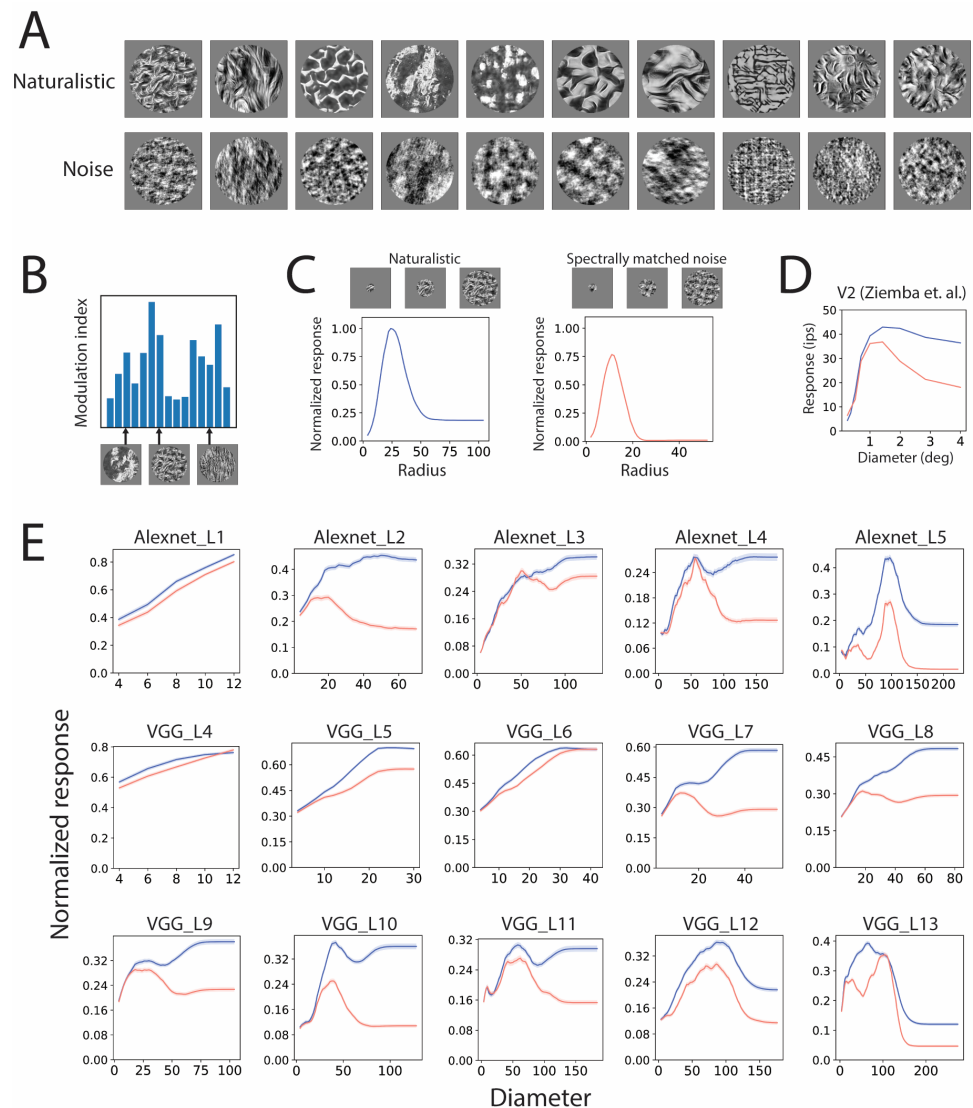

**Fig 7. Surround suppression of naturalistic textures and noise.** A. Naturalistic textures and spectrally matched noise used in the experiments. Naturalistic textures were synthesized using an algorithm described in Methods. B. Texture tuning of an example CNN neuron. The "optimal" textures for each CNN neuron was determined by the textures with the highest modulation index (see details in Methods). The "optimal" textures were then used to study the texture surround effects. C. Texture and noise diameter tuning curves for an example CNN neuron. D. Averaged naturalistic texture and spectrally matched noise diameter tuning curves in monkey V2 (Reproduced from [30]). Noise induces stronger surround suppression. E. Averaged diameter tuning curves in CNN layers. Noise appears to induce stronger surround suppression in most layers.

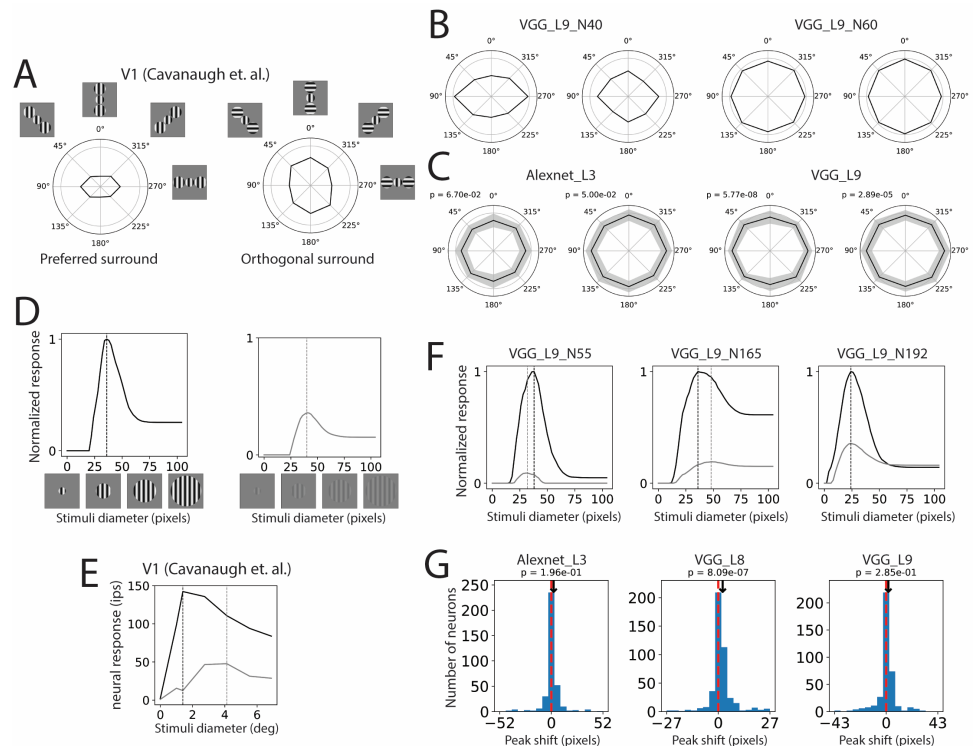

**Fig 8. Two mismatches between CNN neurons and cortical neurons.** A, C: Geometry effects of the surround suppression. A. Strength of the surround suppression depends on the location of the surround stimuli. Embed images show the stimuli used in this experiment. The center was fixed at the optimal orientation. The surround had two patches at different locations relative to the center stimuli. The surround was either at optimal orientation or orthogonal orientation. Surround patches that align with the center stimuli induce the strongest suppression when it is at optimal orientation and the strongest facilitation when it is at orthogonal orientation. The polar radius represents the normalized response where the gray circle represents 1 (reproduced from [15]). B. Plots of two example CNN neurons. C. Averaged plots of two CNN layers. P values were calculated from one-way repeated measure ANOVA. Though some neurons and layers showed significant modulation effects of surround location, the effect size and shape of the plots did not match the cortical neurons. D, E, F, G: Peak shift of the low contrast diameter tuning curve. D. We computed diameter tuning curves of each neuron with the normal contrast (high contrast, black line) and 17% of the normal contrast (low contrast, gray line). Dotted vertical lines indicate peaks of the diameter tuning curves. E. Two diameter tuning curves of an example V1 neuron (reproduced from [15]). The low contrast peak is shifted rightward. F. Three example CNN neurons with different directions of peak shift. G. Histogram of peak shift in three CNN layers. Peak shift is defined as low contrast peak diameter subtracting high contrast peak diameter. Positive values are more commonly found in cortical neurons. P values were calculated from paired t-test.



findings could reveal new surround effects across the visual hierarchy, and help elucidate to what extent paradigms of homogeneity play a role in surround suppression in higher visual areas.

How can a generic feedforward CNN capture a signature of surround suppression? Since surround effects are thought to arise from nonlinear computations such as divisive normalization and recurrent and feedback connections, feedforward CNNs without those connections are not supposed to capture such effects. However, CNNs can potentially capture surround effects by stacking layers. From a statistical perspective, this could relate to computational studies showing that in deeper layers of CNNs, the activations of neighboring neurons are less statistically dependent, thereby achieving some of the statistical properties that have been attributed to divisive normalization [57]. Surround suppression in CNNs may also be achieved by subtractive suppression from the surround, due to a combination of weighted outputs from the previous layer (i.e., more negative weights on average in the surround).

Is the surround suppression we observe in standard feedforward architectures subtractive or divisive? Some studies have shown that surround effects in neurophysiology are better fit with a divisive than subtractive model [16, 58, 59]. Contrast experiments have been used to distinguish if the surround effects are divisive and/or subtractive. We simulated an experiment with such a design (Supplementary Fig 9). The results showed a weak preference for the subtractive model over the divisive model (Supplementary Fig 10). Though generic CNNs do not contain division explicitly, our results rejected that the surround effects are purely subtractive. Elucidating the abstract mathematical form of surround effects in CNNs will require future studies.

How can the most suppressive surround in the CNN follow the change in the center? This surprising observation in CNNs can be conceptually explained by stacking two layers. Assume that the most suppressive surround of the previous layer is similar to the preferred center, but that it cannot follow a change in the center stimulus (i.e., when the neuron is presented with a non-optimal center stimulus). In the next layer, the most suppressive surround can gain this ability due to the nonlinear activation function after the previous layer. In detail, one center stimulus elicits an activation profile in the previous layer; the most suppressive surround should match this profile to gain the maximum suppression. Thus, the surround matches the center pattern. Otherwise, if the most suppressive surround stays the same as the preferred center rather than the altered center pattern, the excessive suppression to some neurons in the previous layer will not be passed due to rectification of the ReLU activation function. Though theoretically two layers can achieve this ability, in practice more layers may be required according to how the assumption is satisfied. This may explain why we only see this ability clearly in later layers in VGG16 but not in early layers or in Alexnet which is shallower.

Studies in V2 have shown that there are additional factors that influence surround suppression, namely whether the stimulus itself is naturalistic or noise. In particular, there is less surround suppression for extended natural textures than for spectrally matched noise ([30], Fig 7), suggesting that the brain suppresses noise stimuli more than naturalistic stimuli. This result cannot be explained by divisive normalization models based on center surround homogeneity, but is interestingly captured in CNNs by the stacking of layers.

In addition to the success cases, we also found important mismatches between CNN neurons and cortical neurons. First, we point out that in the generic CNN model, there is not a clear separation of center and surround regions as in the visual cortex (see Methods). The surround alone in our simulations sometimes elicited a weak response unlike the convention in neurophysiology, especially in early layers (see Figure 2). In terms of the simulations, surround suppression was less dependent on the geometric



location of the surround stimuli in CNN neurons than in the neurophysiology (Fig 8, Supplementary Fig 7). Our notion of homogeneity in this study is indeed more limited than image statistics models that infer the statistical dependencies between the center and surround stimuli, and therefore can capture such geometric effects [21]. This indicates that CNNs do not capture natural scene statistics pertaining to the geometry, or that this type of geometric dependency is not required for the image classification task which the neural network was trained on. This suggests that explicitly incorporating such scene statistics in deep neural networks via divisive normalization [25, 48] may improve the results. We also found that for contrast changes, CNNs behave differently from cortical neurons. In the brain, the grating diameter tuning curve peaks later when the contrast is low [10, 16, 26], suggesting, for instance, that there is broader facilitation rather than suppression of lateral inputs when the inputs are weak [28]. Though this emerged for some CNN neurons, it did not reach statistical significance in most layers of the CNN (Fig 8, Supplementary Fig 8). This may be due to the activation function used in CNNs (in our case, ReLU), rather than saturating functions that could emerge from divisive normalization. Such contrast phenomena have been explained by image statistics models [21, 24], and again suggest routes for improving the results of CNNs in future work. Another aspect that the model did not capture is the greater suppression for gratings than for texture and noise stimuli [30], which may again require a mechanism for contrast normalization.

Surround suppression has been considered to have a number of beneficial roles in neural computation, for example, reducing coding redundancy and yielding more efficient neural codes [12, 14, 19, 21, 22, 24, 25, 27, 60, 61]. Some studies in machine learning noticed the lack of more sophisticated forms of brain-like divisive normalization in generic feedforward CNNs, and tried to integrate them into the network [47–51]. These studies found that incorporating divisive normalization in CNNs improves image classification in some limited cases, such as when the network is more shallow [49], when the dataset requires strong center-surround separation [49], or when the divisive normalization is combined with batch normalization [50]. The correspondence we found between generic CNNs and the brain regarding center surround similarity may explain why including divisive normalization explicitly in CNNs has only limited improvement in classification, especially when the networks are deep. However, some of the mismatches also suggest a need for exploration of such deep learning architectures that explicitly incorporate contextual information. This is in line with other studies showing that complex perceptual uncrowding phenomena are not explained by generic CNNs and require a mechanism for grouping and segmentation [62]. Studies of contour integration have also incorporated functional columns and lateral connections [52, 63]. Biologically inspired computations that efficiently capture surround effects may help design artificial neural networks that are shallow and more efficient.

Our findings overall demonstrate that standard feedforward architectures exhibit surround suppression based on the similarity between center and surround stimuli, suggesting that such architectures can capture and generalize an important characteristic of surround effects in cortical neurons. Our findings extend the ability of generic CNNs as models of visual cortices. The mismatches we found may inspire future studies of contextual effects in deep neural networks with more sophisticated circuitry, including the role of divisive normalization [47–51, 64], recurrent connections and feedback [65–70] in hierarchical architectures.

|                              |                           |
|------------------------------|---------------------------|
| Alexnet                      | VGG16                     |
| Conv2D_11_4_96-BN-ReLU (L1)  | Conv2D_3_1_64-ReLU (L1)   |
| MaxPooling_2_2               | Conv2D_3_1_64-ReLU (L2)   |
| Conv2D_5_1_256-BN-ReLU (L2)  | MaxPooling_2_2            |
| MaxPooling_2_2               | Conv2D_3_1_128-ReLU (L3)  |
| Conv_2D_3_1_384-BN-ReLU (L3) | Conv2D_3_1_128-ReLU (L4)  |
| Conv_2D_3_1_384-BN-ReLU (L4) | MaxPooling_2_2            |
| Conv_2D_3_1_256-BN-ReLU (L5) | Conv2D_3_1_256-ReLU (L5)  |
| MaxPooling_2_2               | Conv2D_3_1_256-ReLU (L6)  |
| Dense_4096-BN-ReLU           | Conv2D_3_1_256-ReLU (L7)  |
| Dropout_0.4                  | MaxPooling_2_2            |
| Dense_4096-BN-ReLU           | Conv2D_3_1_512-ReLU (L8)  |
| Dropout_0.4                  | Conv2D_3_1_512-ReLU (L9)  |
| Dense_1000-BN-ReLU           | Conv2D_3_1_512-ReLU (L10) |
| Dropout_0.4                  | MaxPooling_2_2            |
| Dense_1000-BN-Softmax        | Conv2D_3_1_512-ReLU (L11) |
|                              | Conv2D_3_1_512-ReLU (L12) |
|                              | Conv2D_3_1_512-ReLU (L13) |
|                              | MaxPooling_2_2            |
|                              | Dense_4096-ReLU           |
|                              | Dropout_0.5               |
|                              | Dense_4096-ReLU           |
|                              | Dropout_0.5               |
|                              | Dense_1000-Softmax        |

**Table 1.** CNN architectures used in this study. The input size of both networks is 224x224x3. Conv2D represents 2D convolutional layer. Three following numbers denotes the kernel size, stride size and channel numbers. BN represents batch normalization. MaxPooling represents 2D max pooling layer. The following numbers denotes the pool size and stride size. Dropout represent dropout layer. The following number denotes dropout rate.

## Methods

### CNN models

We trained an Alexnet-style and a VGG16-style network on the Imagenet dataset mostly following the original papers respectively [53,54]. Model files are available in the online repository. Our results are not altered qualitatively when using other publicly available CNN instances. There are several changes we made to the original model. These changes are prevalent and have become almost new standards. We replaced local response normalization in Alexnet with batch normalization, and step decay with cosine decay for the learning rate scheduling. For training Alexnet, we trained on one GPU rather than two as in the original study. We used the data augmentation process described in [53] for training the CNNs. We applied the standard Xavier uniform method to initialize weights in the convolutional and dense layers. The architectures are shown in table 1. Since the dense layers do not have spatial feature maps that are crucial for determining surround effects, only convolutional layers are analyzed in this study.

Since the feature maps of all the convolutional layers in our study have an even number of neurons in height and width, the center neurons we selected are actually a half unit away from the image center. And these half unit displacements in the feature maps correspond to different pixel numbers when tracing back to the input image. In

this study, we always put stimuli at the true center of each neuron. That means for each layer, the displacement of the stimuli from the image center was adjusted based on the shape of the feature maps. The displacement in pixels is calculated by the formula:

$$\frac{224}{2 \times \text{height of the feature map}}$$

For each CNN neuron, we can derive a theoretical receptive field by tracing the feedforward computations [71]. Note that this theoretical receptive field is different from the classical receptive field in the neurophysiology literature. Stimuli beyond the theoretical receptive field are guaranteed to have no effect on the neuron's responses. We followed the method in [71] to compute the theoretical receptive field for each CNN layers. The values are shown in Supplementary figure 11.

## Finding optimal grating stimuli for each CNN neuron

A key component of our simulations was to define the diameter that separates the center and surround; in other words, an analogy to the classical receptive field in neurophysiology settings. We tried to mimic the neurophysiology experiments that define these diameters as much as possible [15] (Fig 1A). First, we characterized neurons by their optimal grating orientation and spatial frequency by grid searching. We used 3 different stimuli sizes: 30%, 50%, and 70% of the theoretical receptive field described in the previous section; 24 spatial periods (the reciprocal of spatial frequency) from 4 pixels to 50 pixels; and 12 orientations from 0° to 180°. Each response value of these stimuli is the average of 8 different phases mimicking the drifting effects in some experiments [15]. We defined the optimal grating orientation and spatial frequency of each neuron by the stimulus that maximally activates it regardless of the stimulus size. Then, these optimal parameters were used to get the diameter tuning curve of each neuron. The grating summation field was defined by the smallest diameter that elicits at least 95% of the maximum response [15]. The grating summation field was used as the border of the center and surround in our experiments.

## In-silico simulations

We did in-silico simulations on CNN neurons following the experimental neurophysiology paradigms as much as possible. For each neural feature map in each layer, we only selected the center neuron (see the section "CNN models") to do the simulation. The method we used to get optimal grating parameters and define the center region are described in the previous sections.

We did not include all the neurons in the analysis due to either an unsuitable center and surround ratio or lack of response variation in the orientation tuning curve. In detail, in Fig 2, 4, and 8, if a neuron's grating summation field is smaller than 30% or larger than 70% of the theoretical receptive field, or the center orientation turning or surround suppression curve has less than 0.001 variation, we excluded it in the analysis. This process ensures the selected neurons have biologically plausible response profiles (i.e. excluding silent neurons) and reasonably large center and surround extents to do the simulations. The included neuron numbers are shown in 2. In early layers, due to the small receptive field size, only few neurons were included. Beyond Alexnet layer 2 and VGG16 layer 5, about half the neurons were included. The neural responses were normalized by dividing the optimal center grating stimuli responses for each neuron.

The center and surround border has been described in the previous sections. In more detail, for our simulations, we chose the center diameter according to the grating summation field; the inner diameter of the surround as the grating summation field plus

4 pixels; and the outer diameter of the surround according to the theoretical receptive field size (Fig 2, 4, 8).

Some neurophysiology studies use the diameter tuning curve for the annular stimuli to determine the inner diameter of the surround stimuli [15,16]. We did not follow this; if we chose the surround extent according to [15,16] as a 95% reduction in the diameter tuning of the annular stimuli responses, many CNN neurons would have a small surround region. As we noted earlier, in the generic CNN, the center and surround are not entirely separable, and the surround in our simulations elicited a weak response (Fig 2). Instead, we set the inner diameter of the surround as the grating summation field plus a fixed value (4 pixels).

## Feature visualization

One can visualize the features in CNNs by finding the optimal inputs that lead to the maximum activations [43–45]. This optimization is done by using the gradient of an activation target regarding the parameterized inputs. In our case, the optimization targets are the responses of each center CNN neuron before the ReLU activation layer. We chose to optimize responses before ReLU to let the gradient flow better to the input; otherwise, the flat zero part of the activation can cause 0 gradient. If no regularization is applied to the optimization, the visualization is usually biased to high frequency and visually unrecognizable noise. We therefore used two kinds of regularizations: naturalistic power spectrum prior and jitter. In detail, we parameterized the input images into the frequency domain, then used the well-known 1/f power law to rescale the frequency components. For the jitter, images in the spatial domain were randomly shifted in both axes with a maximum value of 8 pixels. These two regularizations can help the visualizations appear more natural. We adapted some code from the python package "lucid" to do the visualization. Our code is available in the online repository.

The innovation of our visualization method is to visualize the surround effects in two steps: first find the most facilitative center image; then find the most suppressive or facilitative surround image.

In detail, to find the most facilitative center image, the center image parameters were used to construct an image; the surround region (see the previous section for the definition) of the image was replaced by gray; then the resulting image was passed to the CNN. We computed the gradient of a center neuron's response with respect to the center image parameters. The gradient was used to optimize the center image parameters by the Adam optimizer. This optimization step was repeated for 500 iterations for each neuron.

To find the most suppressive or facilitative surround image, the surround image parameters were used to construct an image; then the center region of this image was replaced by the most facilitative center image described in the previous paragraph; then the optimization procedure for the surround image parameters was the same as the procedure for the center.

We used the Adam optimizer for all the layers in both networks. We found that the learning rate that can generate visualizations with vivid color and clear patterns varies across layers. In Alexnet, the first three layers are 0.001; the latter two layers are 0.005. In VGG16, layers 1 to 5 are 0.0005; layers 6 to 9 are 0.001; layers 10 to 11 are 0.0025, layers 12 to 13 are 0.005.

## Naturalistic texture synthesis

In the naturalistic and spectrally matched noise simulation, we synthesized 225 naturalistic texture images from 15 original texture images and their corresponding spectrally matched noise images [72,73]. We found the optimal textures for each neuron

via the modulation indexes, i.e. difference divided by the sum of responses to the naturalistic and noise images (Fig 7B). We used the top 5 textures for each neuron in the simulations. If there were not 5 textures that could elicit non-zero responses, we only used the textures that could elicit non-zero responses. If no texture could elicit non-zero responses, we dropped the neuron in the analysis. The neural responses were first averaged per texture family for naturalistic or spectrally matched noise respectively. For each neuron, the normalization factor was the maximum of all response values. The responses of a texture family, both naturalistic and spectrally matched noise, were divided by the normalization factor. Then the diameter tuning curves were averaged across neurons to get the averaged diameter tuning curves in (Fig 7E).

The naturalistic and spectrally matched noise images used in this study are generated according to [74]. We used a texture synthesis algorithm that has been applied in many neurophysiology experiments [30, 72, 73, 75]. The algorithm takes an example image as input and a random seed, and iteratively modifies a noise image to match a set of defined image statistics of the example images. The source images we used are from previous neurophysiology studies [73, 75] and include 15 grayscale images with 320 x 320 resolution. We synthesized 15 naturalistic images with different random seeds for each source image. The spectrally matched noise images were generated by replacing the phase of the naturalistic images in the Fourier domain with the phase of Gaussian white noise images.

## Supporting information

**S1 Appendix. Online repository** CNN model files, code, and the full set of the visualization can be found in the online repository:

[https://gin.g-node.org/xupan/CNN\\_surround\\_effects\\_visualization](https://gin.g-node.org/xupan/CNN_surround_effects_visualization)

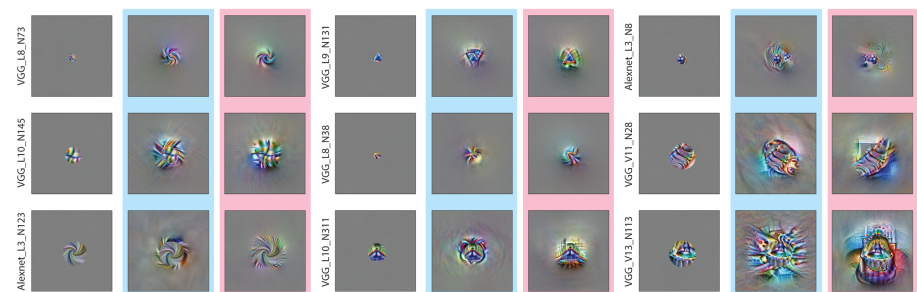

**S1 Fig. Examples of visualization of the most suppressive and facilitative surround for CNN neurons that do not show obvious homogeneity.** The blue background denotes the most suppressive surround; the pink background denotes the most facilitative surround. These neurons do not have clear center-surround contrastive features; they are likely to include surround features that are geometrically arranged rather than uniform across the surround or features that are arranged as object-like shapes

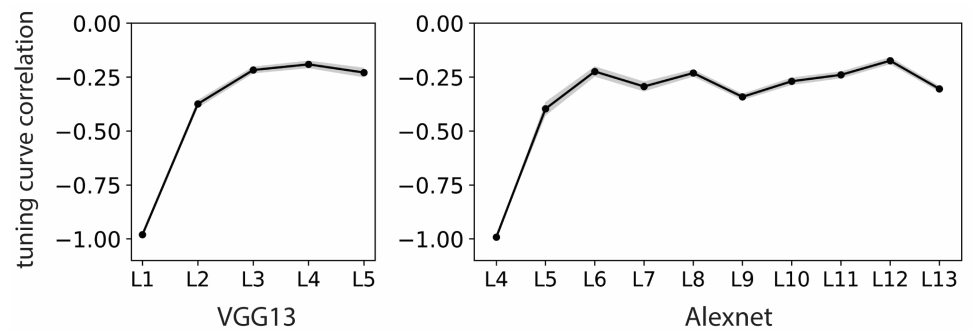

**S2 Fig. Correlation coefficients between the center orientation tuning curve and surround suppression orientation tuning curve, i.e. tuning curve correlation.** Correlation coefficients were computed per neuron and then averaged per layer. Note that the correlation coefficients are all negative in all layers, which indicates the most suppressive surround orientation matches the optimal center orientation. Shaded area indicates s.e.m.

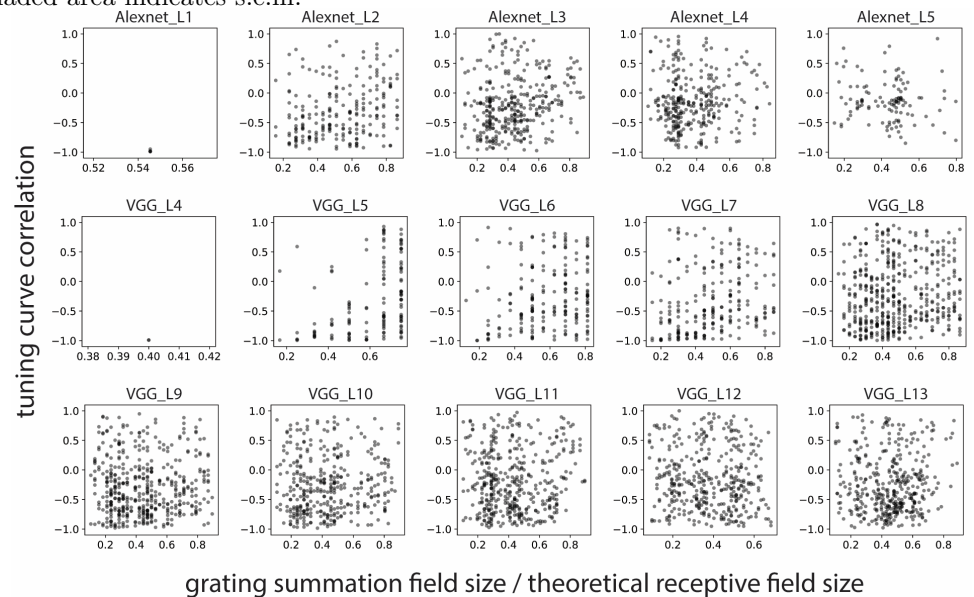

**S3 Fig. Relationship between tuning curve correlation and the relative size of the center to the surround, i.e. grating summation field divided by theoretical receptive field.** In the main experiments, we focused our analysis on the neurons with sufficiently large center and surround sizes. In some layers, especially middle layers, neurons with negative tuning curve correlation are concentrated at a center-surround ratio of 0.2 to 0.5.



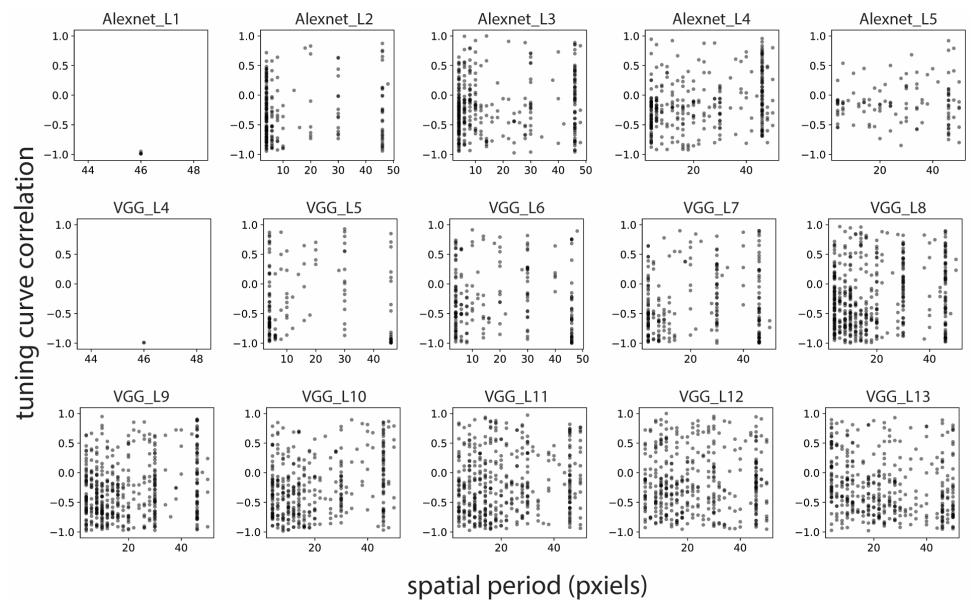

**S4 Fig. Relationship between tuning curve correlation and the optimal spatial period.** We found the distributions are multi-model. Many neurons with negative tuning curve correlation are concentrated below 30-pixel spatial period. There are some neurons that have large spatial periods, e.g. 50 pixels. Those neurons are likely to be tuned to large color patches or complex patches beyond simple gratings.

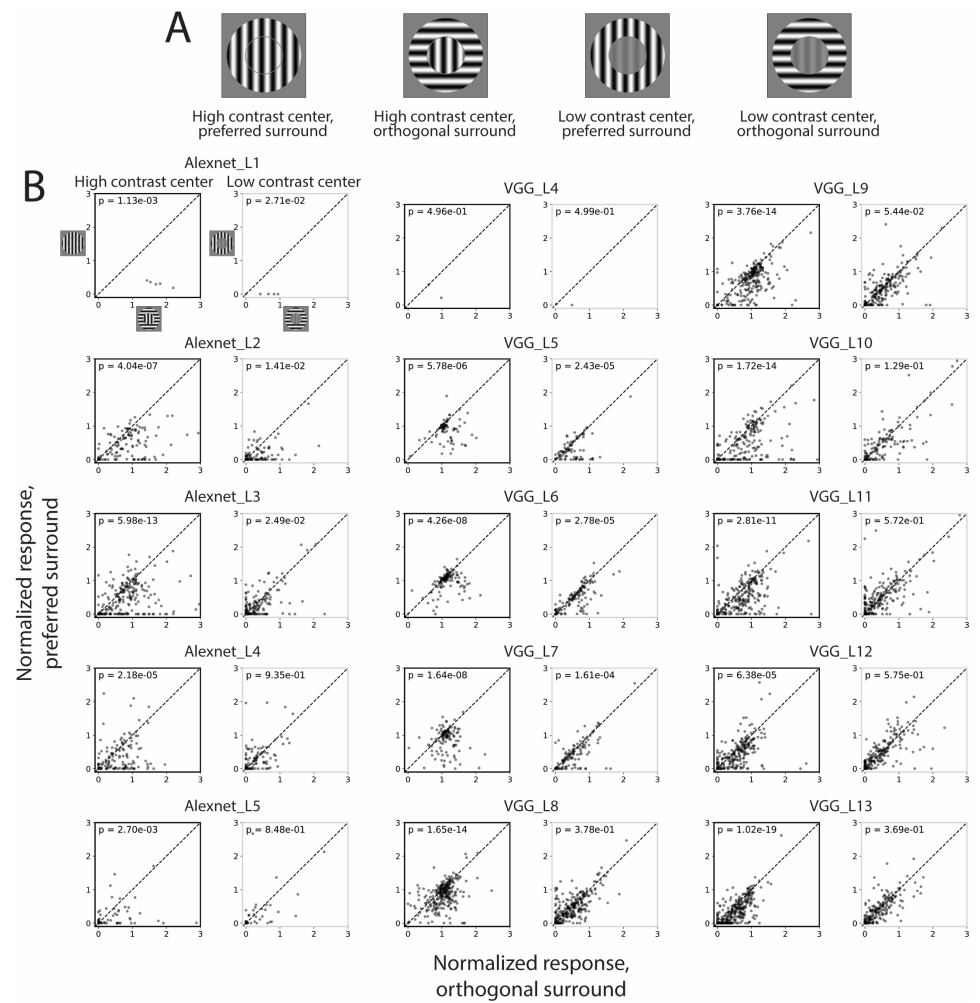

**S5 Fig. The optimal surround stimulus orientation is more suppressive when the center contrast is high.** **A.** Stimuli used in the experiments. The surround is either at the optimal orientation (preferred surround) or orthogonal to the optimal orientation (orthogonal surround). The center contrast is either at the regular pixel range (high contrast) or 17% of the regular range (low contrast). **B.** Scatter plots of the responses for preferred surround versus orthogonal surround. Plots with black frames used high contrast center; plots with gray frames used low contrast center. P values were calculated from the paired sample t-test (preferred surround versus orthogonal surround). Points below the diagonal lines indicate more suppression when the surround is at the optimal orientation than when it is at the orthogonal orientation. This effect is more pronounced when the center contrast is high.

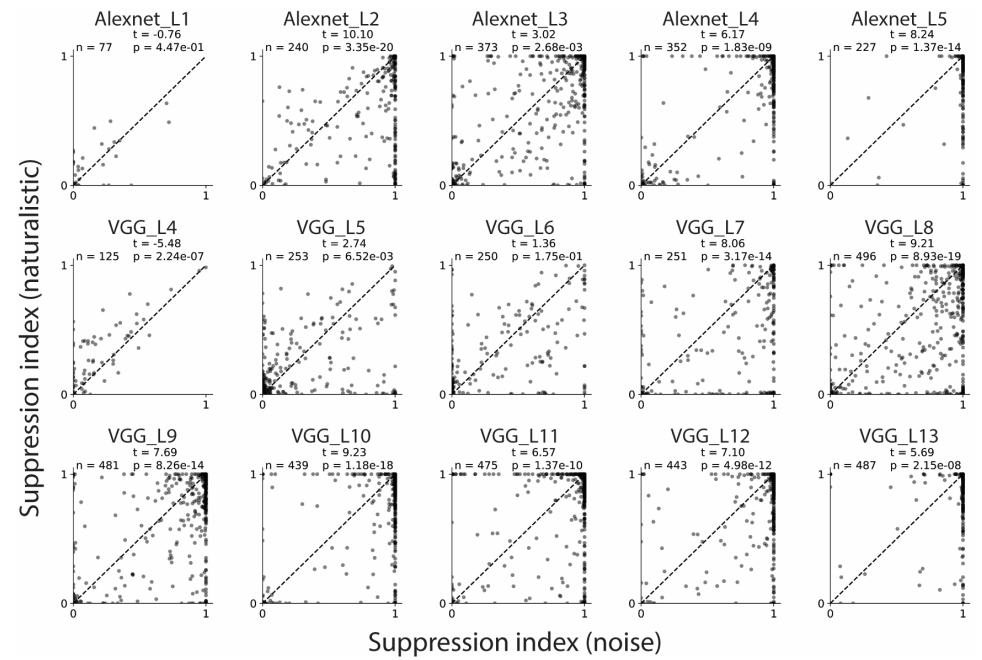

**S6 Fig. Naturalistic texture suppression index versus spectrally matched noise suppression index.** Each dot represents a neuron. In most middle and later layers, neurons have higher suppression indexes with noise images than with naturalistic images, as indicated by the positive t-value and small p-value. T and P values are from paired t-test.

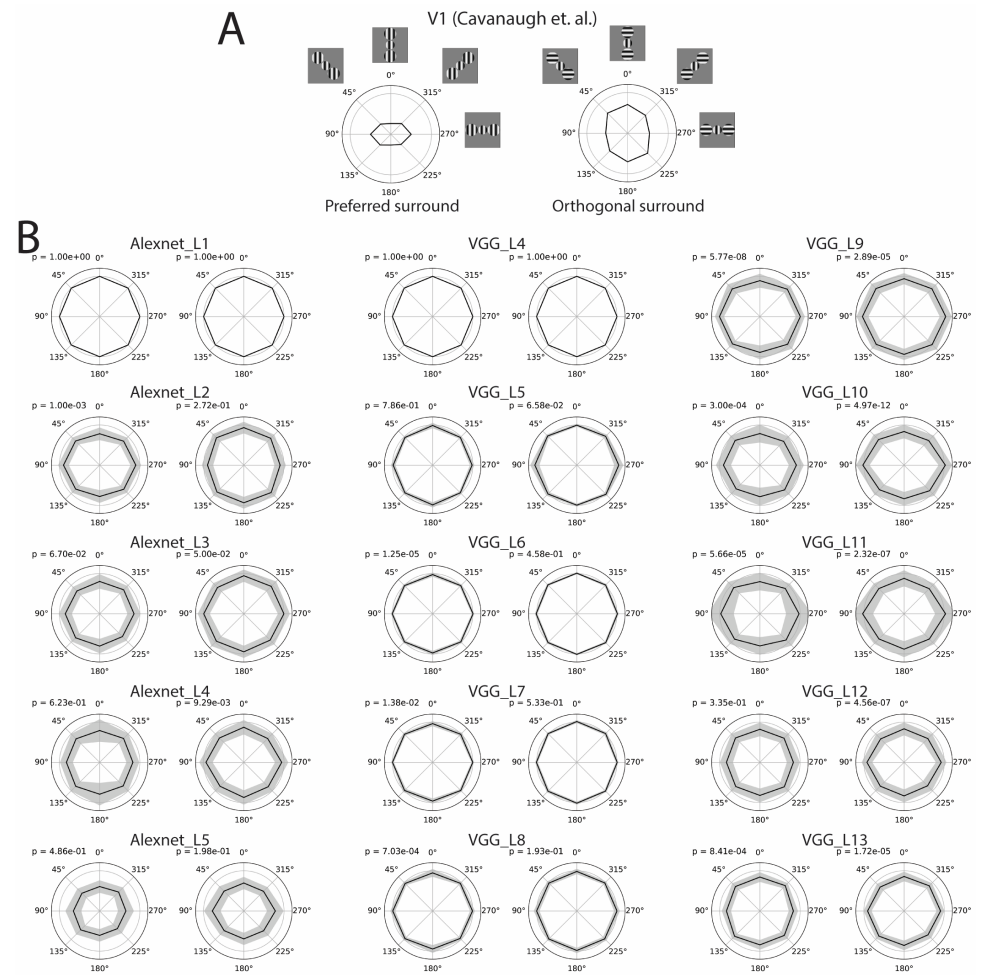

**S7 Fig. Geometry effects of the surround suppression.** A. Strength of the surround suppression depends on the location of the surround stimuli. Embed images show the stimuli used in this experiment. The center was fixed at the optimal orientation. The surround had two patches at different locations relative to the center stimuli. The surround was either at optimal orientation or orthogonal orientation. Surround patches that align with the center stimuli induce the strongest suppression when it is at optimal orientation and the strongest facilitation when it is at orthogonal orientation. The polar radius represents the normalized response whereas the gray circle represents 1 (reproduced from [15]). C. Averaged plots of CNN layers. P values were calculated from one-way repeated measure ANOVA. Though some neurons and layers showed modulation effects of surround location, the effect size and shape of the plots did not match the cortical neurons shown in A.

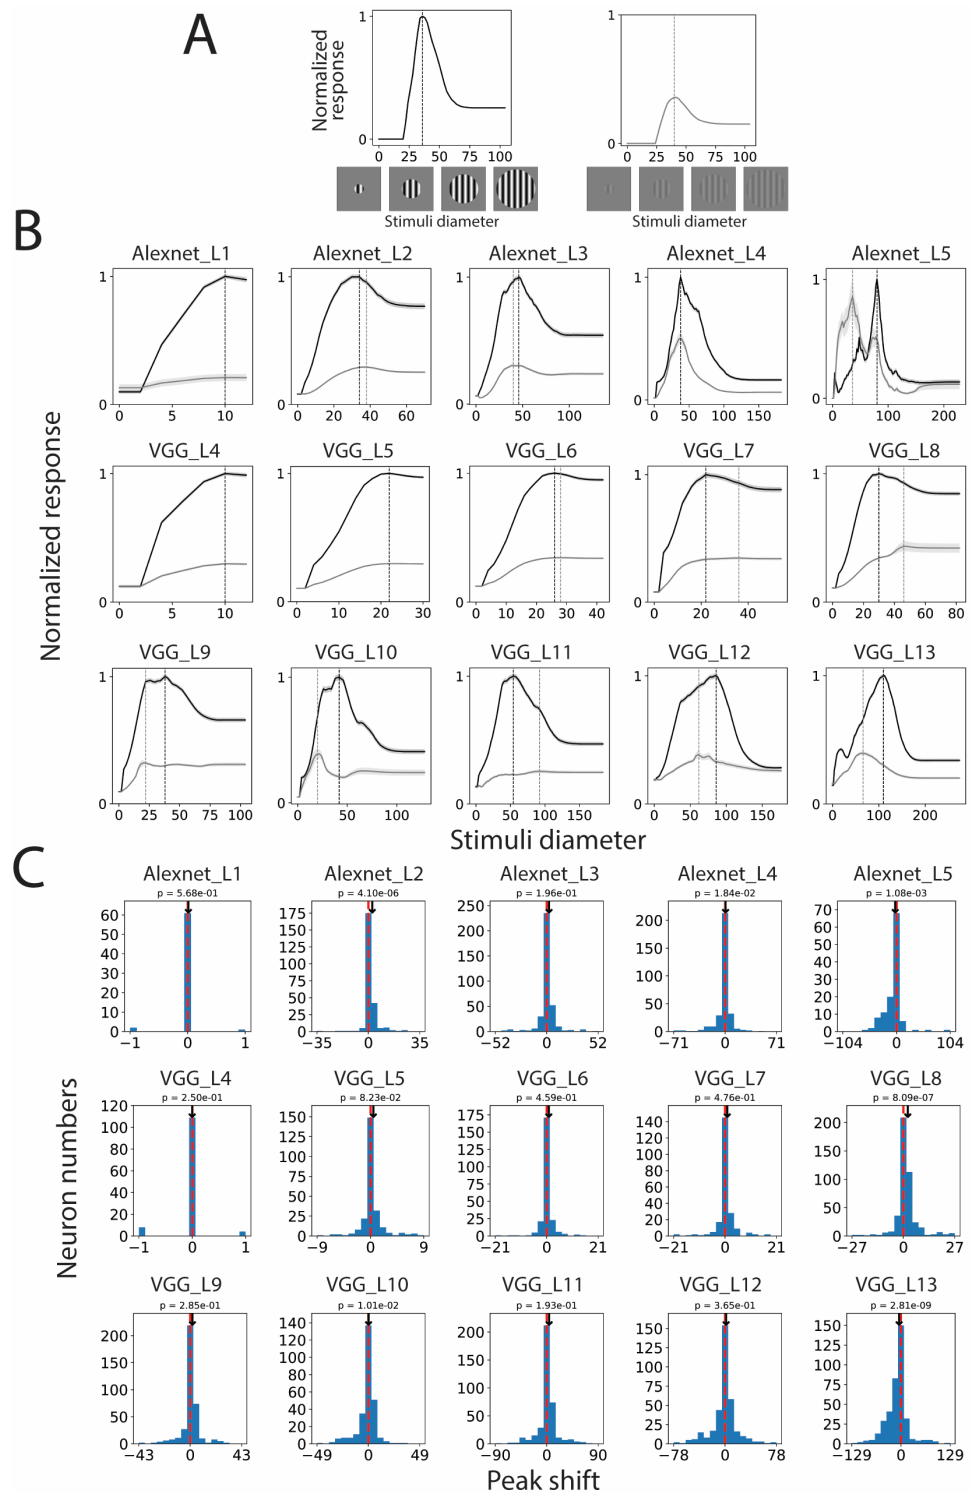

**S8 Fig. Low contrast does not consistently shift the peak of the diameter tuning curve as expected in neurophysiology.** In neurophysiology studies, a low contrast grating causes the peak of the diameter tuning curves to shift to a larger size. We tested this effect in CNN neurons. A. Stimuli used in the simulation. Low contrast

stimuli are at 17% of the regular pixel value range. B. Averaged diameter tuning curves with regular and low contrast stimuli. The black line denotes the regular contrast stimuli; the gray line denotes the low contrast stimuli. C. Histograms of the peak shift values. Positive values indicate low contrast stimuli shifted peak to a larger size, which is seen in cortical data. CNN neurons did not consistently show similar effects. In later layers, the low contrast peak even shifted to a smaller size significantly. Shaded area indicates s.e.m. P values are from paired t-test.

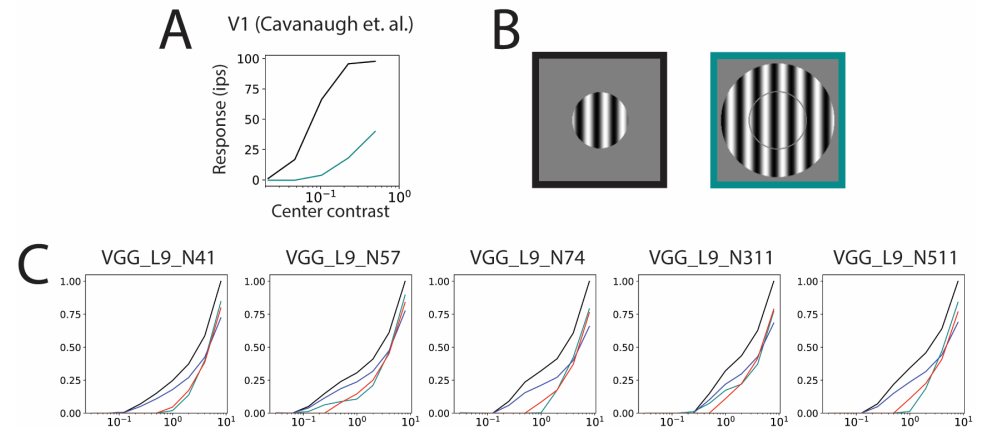

**S9 Fig. Center contrast responses for no surround and preferred surround.** Contrast values were normalized to the regular pixel value range. We fixed the surround contrast at 1, changed the center contrast, and measured the contrast response function. We then fitted two curves with subtractive and divisive models. The subtractive model is described as  $R_s = \max(0, R_c - a)$ , where  $R_c$  is the responses of the center stimuli;  $R_s$  is the responses of the center stimuli with preferred surround;  $a$  is a subtractive parameter that is to be fitted. The divisive model is described as  $R_s = R_c/b$ , where  $b$  is a divisive parameter that is to be fitted. A. An example V1 neuron from a reference neurophysiology study (reproduced from [16]). Black line denotes no surround; cyan line denotes orthogonal surround. The contrast responses are shifted rightward and downward with surround suppression. B. Stimuli examples used in the experiments. C. Example CNN neurons with different behaviors. Blue line denotes a fitted surround suppression contrast curve with the divisive model; red line denotes a fitted surround suppression contrast curve with the subtractive model.



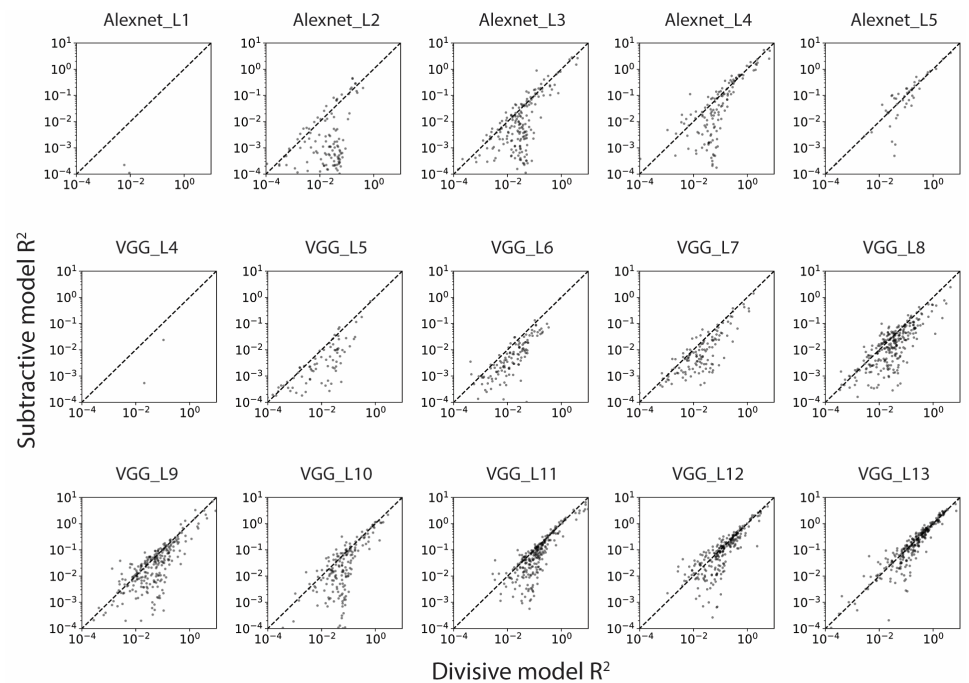

**S10 Fig. Explainability of subtractive and divisive models.** To determine if the surround suppression effect is more likely to be in subtractive form or divisive form, we fitted contrast curves in supplementary figure 9 with no surround and preferred surround by two models. The x-axis is the fitting error (squared error in log scale,  $R^2$ ) of the divisive model; The y-axis is the fitting error of the subtractive model. Points below the diagonal line indicate neuron's surround is more likely to be subtractive than divisive, which is commonly seen in most layers, especially early layers in both networks.

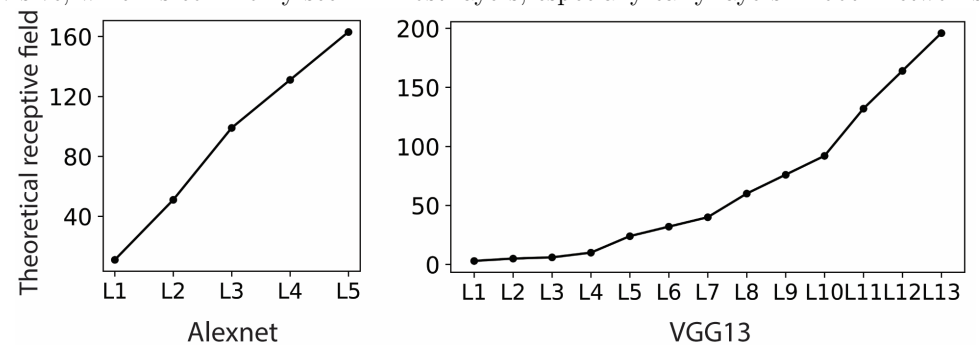

**S11 Fig. Theoretical receptive field in VGG13 and Alexnet.** See Methods for more details.

## Acknowledgments

We are grateful to Ruben Coen-Cagli for his advice and comments on the manuscript. This work was supported by a University of Miami Provost's Research Award to O.S. A.D. was supported by the Research Experiences for Undergraduates (REU) Site *Scientific Computing for Structure in Big or Complex Datasets*, NSF grant CNS-1949972.

# References

1. Herzog MH, Fahle M. Effects of grouping in contextual modulation. *Nature*. 2002;415(6870):433–436.
2. Lamme VA. The neurophysiology of figure-ground segregation in primary visual cortex. *Journal of neuroscience*. 1995;15(2):1605–1615.
3. Li Z. A saliency map in primary visual cortex. *Trends in cognitive sciences*. 2002;6(1):9–16.
4. Dörries K, Loeber G, Meixensberger J. Association of polyomaviruses JC, SV40, and BK with human brain tumors. *Virology*. 1987;160(1):268–270.
5. Eagleman DM. Visual illusions and neurobiology. *Nature Reviews Neuroscience*. 2001;2(12):920–926.
6. Yang E, Tadin D, Glasser DM, Hong SW, Blake R, Park S. Visual context processing in schizophrenia. *Clinical psychological science*. 2013;1(1):5–15.
7. Schallmo MP, Sponheim SR, Olman CA. Reduced contextual effects on visual contrast perception in schizophrenia and bipolar affective disorder. *Psychological medicine*. 2015;45(16):3527–3537.
8. King DJ, Hodgekins J, Chouinard PA, Chouinard VA, Sperandio I. A review of abnormalities in the perception of visual illusions in schizophrenia. *Psychonomic Bulletin & Review*. 2017;24(3):734–751.
9. Levitt JB, Lund JS. Contrast dependence of contextual effects in primate visual cortex. *Nature*. 1997;387(6628):73–76.
10. Sceniak MP, Ringach DL, Hawken MJ, Shapley R. Contrast’s effect on spatial summation by macaque V1 neurons. *Nature neuroscience*. 1999;2(8):733–739.
11. Li Z. Contextual influences in V1 as a basis for pop out and asymmetry in visual search. *Proceedings of the National Academy of Sciences*. 1999;96(18):10530–10535.
12. Rao RP, Ballard DH. Predictive coding in the visual cortex: a functional interpretation of some extra-classical receptive-field effects. *Nature neuroscience*. 1999;2(1):79–87.
13. Schwartz O, Simoncelli EP. Natural signal statistics and sensory gain control. *Nature neuroscience*. 2001;4(8):819–825.
14. Li Z. Computational design and nonlinear dynamics of a recurrent network model of the primary visual cortex. *Neural computation*. 2001;13(8):1749–1780.
15. Cavanaugh JR, Bair W, Movshon JA. Selectivity and spatial distribution of signals from the receptive field surround in macaque V1 neurons. *Journal of neurophysiology*. 2002;.
16. Cavanaugh JR, Bair W, Movshon JA. Nature and interaction of signals from the receptive field center and surround in macaque V1 neurons. *Journal of neurophysiology*. 2002;88(5):2530–2546.
17. Jones H, Wang W, Sillito A. Spatial organization and magnitude of orientation contrast interactions in primate V1. *Journal of neurophysiology*. 2002;88(5):2796–2808.

18. Series P, Lorenceau J, Frégnac Y. The “silent” surround of V1 receptive fields: theory and experiments. *Journal of physiology-Paris*. 2003;97(4-6):453–474.
19. Ozeki H, Finn IM, Schaffer ES, Miller KD, Ferster D. Inhibitory stabilization of the cortical network underlies visual surround suppression. *Neuron*. 2009;62(4):578–592.
20. Lochmann T, Ernst UA, Deneve S. Perceptual inference predicts contextual modulations of sensory responses. *Journal of neuroscience*. 2012;32(12):4179–4195.
21. Coen-Cagli R, Dayan P, Schwartz O. Cortical surround interactions and perceptual salience via natural scene statistics. *PLoS computational biology*. 2012;8(3):e1002405.
22. Spratling MW. Predictive coding as a model of the V1 saliency map hypothesis. *Neural Networks*. 2012;26:7–28.
23. Carandini M, Heeger DJ. Normalization as a canonical neural computation. *Nature Reviews Neuroscience*. 2012;13(1):51–62.
24. Zhu M, Rozell CJ. Visual nonclassical receptive field effects emerge from sparse coding in a dynamical system. *PLoS computational biology*. 2013;9(8):e1003191.
25. Coen-Cagli R, Kohn A, Schwartz O. Flexible gating of contextual influences in natural vision. *Nature neuroscience*. 2015;18(11):1648–1655.
26. Angelucci A, Bijanzadeh M, Nurminen L, Federer F, Merlin S, Bressloff PC. Circuits and mechanisms for surround modulation in visual cortex. *Annual review of neuroscience*. 2017;40:425–451.
27. Chalk M, Marre O, Tkačik G. Toward a unified theory of efficient, predictive, and sparse coding. *Proceedings of the National Academy of Sciences*. 2018;115(1):186–191.
28. Keller AJ, Dipoppa M, Roth MM, Caudill MS, Ingrosso A, Miller KD, et al. A disinhibitory circuit for contextual modulation in primary visual cortex. *Neuron*. 2020;108(6):1181–1193.
29. Angelucci A, Bijanzadeh M, Nurminen L, Federer F, Merlin S, Bressloff PC. Circuits and mechanisms for surround modulation in visual cortex. *Annual review of neuroscience*. 2017;40:425.
30. Ziemba CM, Freeman J, Simoncelli EP, Movshon JA. Contextual modulation of sensitivity to naturalistic image structure in macaque V2. *Journal of neurophysiology*. 2018;120(2):409–420.
31. Kim T, Bair W, Pasupathy A. Neural coding for shape and texture in macaque area V4. *Journal of Neuroscience*. 2019;39(24):4760–4774.
32. Yamins DL, Hong H, Cadieu CF, Solomon EA, Seibert D, DiCarlo JJ. Performance-optimized hierarchical models predict neural responses in higher visual cortex. *Proceedings of the national academy of sciences*. 2014;111(23):8619–8624.
33. Vintch B, Movshon JA, Simoncelli EP. A convolutional subunit model for neuronal responses in macaque V1. *Journal of Neuroscience*. 2015;35(44):14829–14841.

34. Batty E, Merel J, Brackbill N, Heitman A, Sher A, Litke A, et al. Multilayer recurrent network models of primate retinal ganglion cell responses. 2016;.
35. Khaligh-Razavi SM, Kriegeskorte N. Deep supervised, but not unsupervised, models may explain IT cortical representation. PLoS computational biology. 2014;10(11):e1003915.
36. Pospisil D, Bair W. Comparing response properties of V1 neurons to those of units in the early layers of a convolutional neural net. Journal of Vision. 2017;17(10):804–804.
37. Kindel WF, Christensen ED, Zylberberg J. Using deep learning to probe the neural code for images in primary visual cortex. Journal of vision. 2019;19(4):29–29.
38. Zhang Y, Lee TS, Li M, Liu F, Tang S. Convolutional neural network models of V1 responses to complex patterns. Journal of computational neuroscience. 2019;46(1):33–54.
39. Marques T, Schrimpf M, DiCarlo JJ. Multi-scale hierarchical neural network models that bridge from single neurons in the primate primary visual cortex to object recognition behavior. bioRxiv. 2021;.
40. Bashivan P, Kar K, DiCarlo JJ. Neural population control via deep image synthesis. Science. 2019;364(6439):eaav9436.
41. Ponce CR, Xiao W, Schade PF, Hartmann TS, Kreiman G, Livingstone MS. Evolving images for visual neurons using a deep generative network reveals coding principles and neuronal preferences. Cell. 2019;177(4):999–1009.
42. Walker EY, Sinz FH, Cobos E, Muhammad T, Froudarakis E, Fahey PG, et al. Inception loops discover what excites neurons most using deep predictive models. Nature neuroscience. 2019;22(12):2060–2065.
43. Olah C, Mordvintsev A, Schubert L. Feature visualization. Distill. 2017;2(11):e7.
44. Mahendran A, Vedaldi A. Understanding deep image representations by inverting them. In: Proceedings of the IEEE conference on computer vision and pattern recognition; 2015. p. 5188–5196.
45. Nguyen A, Yosinski J, Clune J. Multifaceted feature visualization: Uncovering the different types of features learned by each neuron in deep neural networks. arXiv preprint arXiv:160203616. 2016;.
46. Sillito AM, Grieve KL, Jones HE, Cudeiro J, Davls J. Visual cortical mechanisms detecting focal orientation discontinuities. Nature. 1995;378(6556):492–496.
47. Ren M, Liao R, Urtasun R, Sinz FH, Zemel RS. Normalizing the normalizers: Comparing and extending network normalization schemes. arXiv preprint arXiv:161104520. 2016;.
48. Giraldo LGS, Schwartz O. Integrating flexible normalization into midlevel representations of deep convolutional neural networks. Neural computation. 2019;31(11):2138–2176.
49. Pan X, Giraldo LGS, Kartal E, Schwartz O. Brain-inspired weighted normalization for CNN image classification. bioRxiv. 2021;.

50. Miller M, Chung S, Miller KD. Divisive Feature Normalization Improves Image Recognition Performance in AlexNet. In: International Conference on Learning Representations; 2021.
51. Veerabadran V, Raina R, de Sa VR. Bio-inspired learnable divisive normalization for ANNs. In: SVRHM 2021 Workshop@ NeurIPS; 2021.
52. Linsley D, Kim J, Ashok A, Serre T. Recurrent neural circuits for contour detection. arXiv preprint arXiv:201015314. 2020;.
53. Krizhevsky A, Sutskever I, Hinton GE. Imagenet classification with deep convolutional neural networks. In: Advances in neural information processing systems (NIPS); 2012. p. 1097–1105.
54. Simonyan K, Zisserman A. Very deep convolutional networks for large-scale image recognition. arXiv preprint arXiv:14091556. 2014;.
55. Polat U, Mizobe K, Pettet MW, Kasamatsu T, Norcia AM. Collinear stimuli regulate visual responses depending on cell's contrast threshold. *Nature*. 1998;391(6667):580–584.
56. Shushruth S, Ichida JM, Levitt JB, Angelucci A. Comparison of spatial summation properties of neurons in macaque V1 and V2. *Journal of neurophysiology*. 2009;102(4):2069–2083.
57. Sanchez-Giraldo LG, Laskar MNU, Schwartz O. Normalization and pooling in hierarchical models of natural images. *Current opinion in neurobiology*. 2019;55:65–72.
58. Ayaz A, Chance FS. Gain modulation of neuronal responses by subtractive and divisive mechanisms of inhibition. *Journal of neurophysiology*. 2009;101(2):958–968.
59. Wilson NR, Runyan CA, Wang FL, Sur M. Division and subtraction by distinct cortical inhibitory networks in vivo. *Nature*. 2012;488(7411):343–348.
60. Schwartz O, Sejnowski TJ, Dayan P. Perceptual organization in the tilt illusion. *Journal of Vision*. 2009;9(4):19–19.
61. Lochmann T, Ernst UA, Deneve S. Perceptual inference predicts contextual modulations of sensory responses. *Journal of neuroscience*. 2012;32(12):4179–4195.
62. Doerig A, Schmittwilken L, Sayim B, Manassi M, Herzog MH. Capsule networks as recurrent models of grouping and segmentation. *PLoS computational biology*. 2020;16(7):e1008017.
63. Khan S, Wong A, Tripp BP. Task-driven learning of contour integration responses in a V1 model. In: NeurIPS 2020 Workshop SVRHM; 2020.
64. Han S, Vasconcelos N. Biologically plausible saliency mechanisms improve feedforward object recognition. *Vision research*. 2010;50(22):2295–2307.
65. Sullivan TJ, De Sa VR. A model of surround suppression through cortical feedback. *Neural networks*. 2006;19(5):564–572.
66. Spoerer CJ, McClure P, Kriegeskorte N. Recurrent convolutional neural networks: a better model of biological object recognition. *Frontiers in psychology*. 2017;8:1551.

67. Kubilius J, Schrimpf M, Nayeri A, Bear D, Yamins DL, DiCarlo JJ. Cornet: Modeling the neural mechanisms of core object recognition. *BioRxiv*. 2018; p. 408385.
68. Serre T. Deep learning: the good, the bad, and the ugly. *Annual review of vision science*. 2019;5(1):399–426.
69. Kar K, Kubilius J, Schmidt K, Issa EB, DiCarlo JJ. Evidence that recurrent circuits are critical to the ventral stream’s execution of core object recognition behavior. *Nature neuroscience*. 2019;22(6):974–983.
70. Lindsay GW, Mrsic-Flogel TD, Sahani M. Bio-inspired neural networks implement different recurrent visual processing strategies than task-trained ones do. *bioRxiv*. 2022;.
71. Araujo A, Norris W, Sim J. Computing receptive fields of convolutional neural networks. *Distill*. 2019;4(11):e21.
72. Portilla J, Simoncelli EP. A parametric texture model based on joint statistics of complex wavelet coefficients. *International journal of computer vision*. 2000;40(1):49–70.
73. Freeman J, Ziemba CM, Heeger DJ, Simoncelli EP, Movshon JA. A functional and perceptual signature of the second visual area in primates. *Nature neuroscience*. 2013;16(7):974–981.
74. Bowren J, Sanchez-Giraldo L, Schwartz O. Inference via sparse coding in a hierarchical vision model. *Journal of vision*. 2022;22(2):19–19.
75. Ziemba CM, Freeman J, Movshon JA, Simoncelli EP. Selectivity and tolerance for visual texture in macaque V2. *Proceedings of the National Academy of Sciences*. 2016;113(22):E3140–E3149.
